# Supplementary material for: Chiral hydroxymethyl-1H,3H-pyrrolo[1,2-c]thiazoles: the search for selective p53-activating agents for colorectal cancer therapy
Source: Royal Society of Chemistry journal article supplement (doi:10.1039/d4md00076e), 2024-01-01
Supplement: d4md00076e1.pdf [file d4md00076e1.pdf]

## Electronic Supporting Information

### **Chiral Hydroxymethyl-1*H*,3*H*-pyrrolo[1,2-*c*]thiazoles: the Search for Selective p53-Activating Agents for Colorectal Cancer Therapy**

Mees M. Hendriks,<sup>a</sup> Adelino M. R. Pereira,<sup>a</sup> Ana B. Pereira,<sup>a</sup> Carla S. C. Carvalho,<sup>b</sup>  
João L. P. Ribeiro,<sup>a</sup> Maria I. L. Soares,<sup>a</sup> Lucília Saraiva,<sup>b,\*</sup>  
Teresa M. V. D. Pinho e Melo <sup>a,\*</sup>

<sup>a</sup>University of Coimbra, Coimbra Chemistry Centre – Institute of Molecular Sciences and Department of Chemistry, 3004-535 Coimbra, Portugal.

<sup>b</sup>LAQV/REQUIMTE, Laboratório de Microbiologia, Departamento de Ciências Biológicas, Faculdade de Farmácia, Universidade do Porto, Porto, Portugal

## Table of Contents

|                                                                                            |    |
|--------------------------------------------------------------------------------------------|----|
| Copies of $^1\text{H}$ , $^{13}\text{C}$ and $^{19}\text{F}$ NMR Spectra for New Compounds | S3 |
|--------------------------------------------------------------------------------------------|----|

## Copies of $^1\text{H}$ , $^{13}\text{C}$ and $^{19}\text{F}$ NMR Spectra for New Compounds

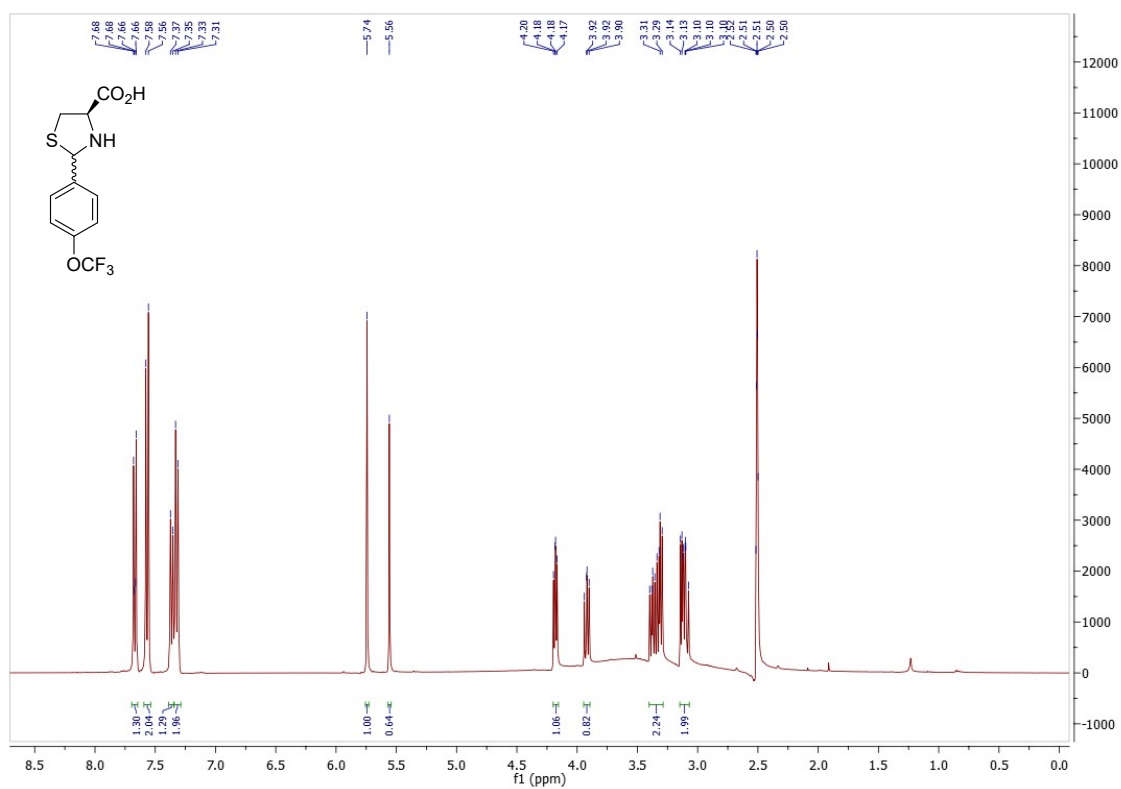

**Figure S1:**  $^1\text{H}$  NMR spectrum of compound **2c** (400 MHz,  $\text{DMSO}-d_6$ ).

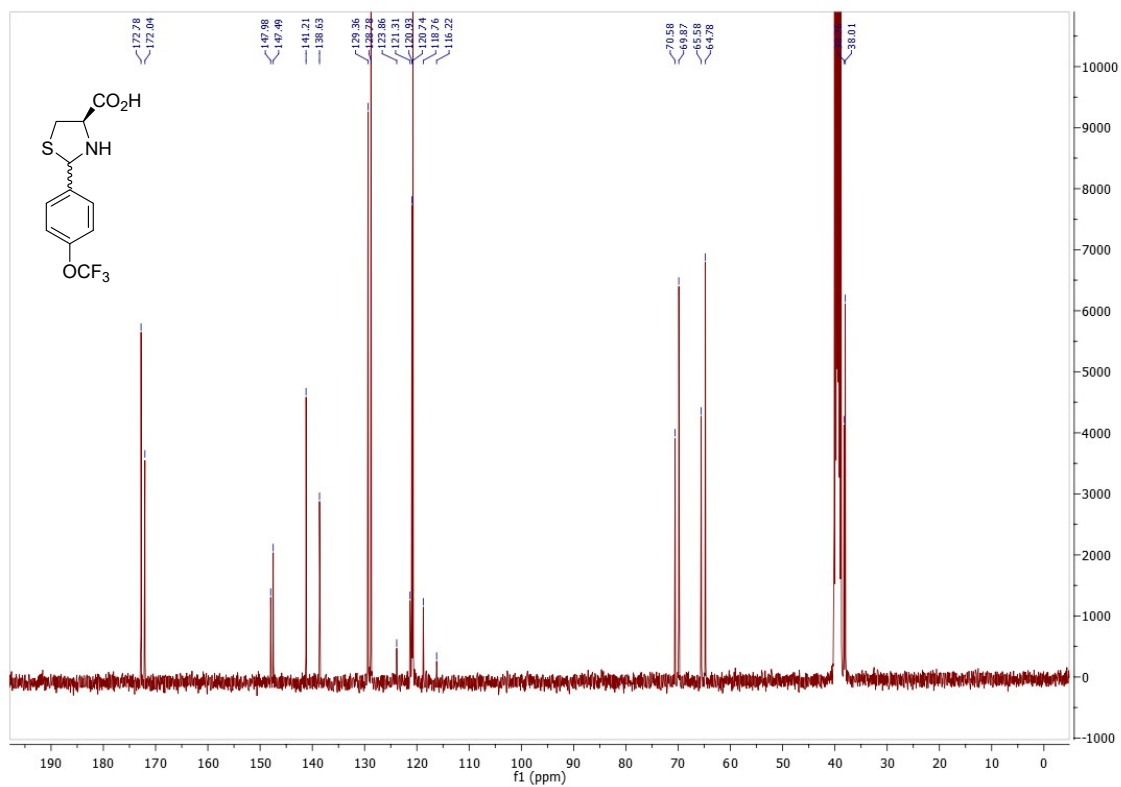

**Figure S2:**  $^{13}\text{C}$  NMR spectrum of compound **2c** (100 MHz,  $\text{DMSO}-d_6$ ).

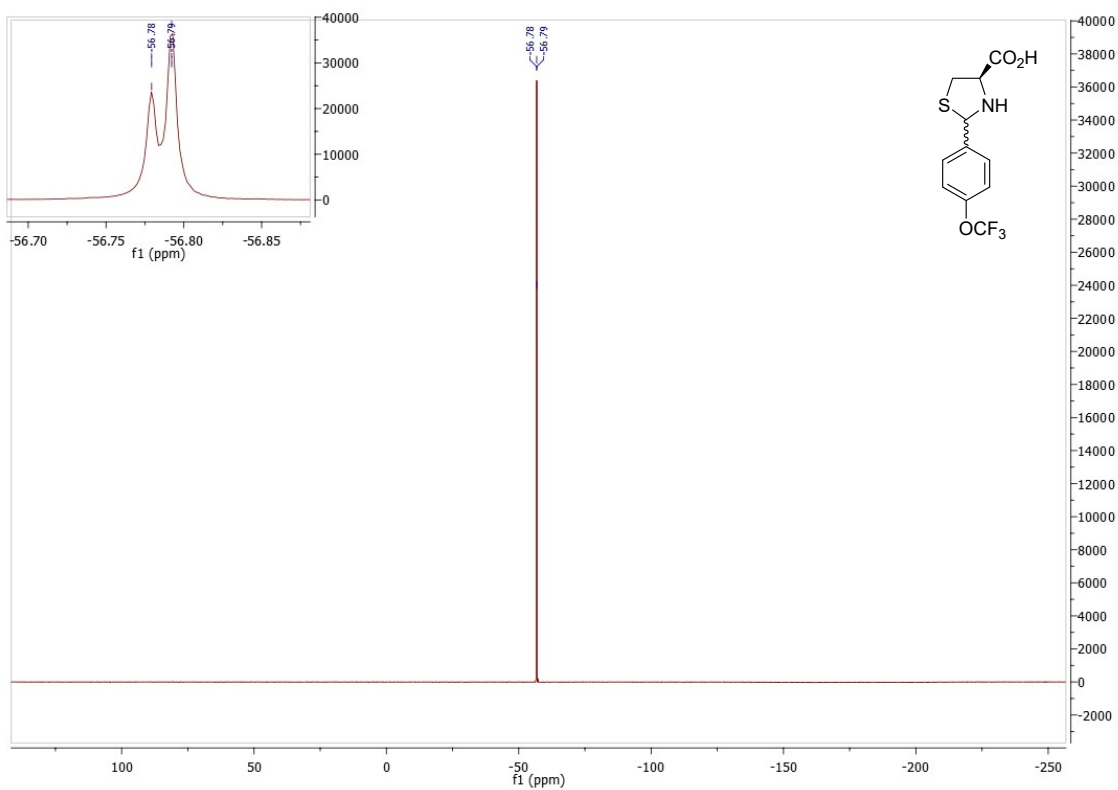

**Figure S3:**  $^{19}\text{F}$  NMR spectrum of compound **2c** (376 MHz,  $\text{DMSO-}d_6$ ).

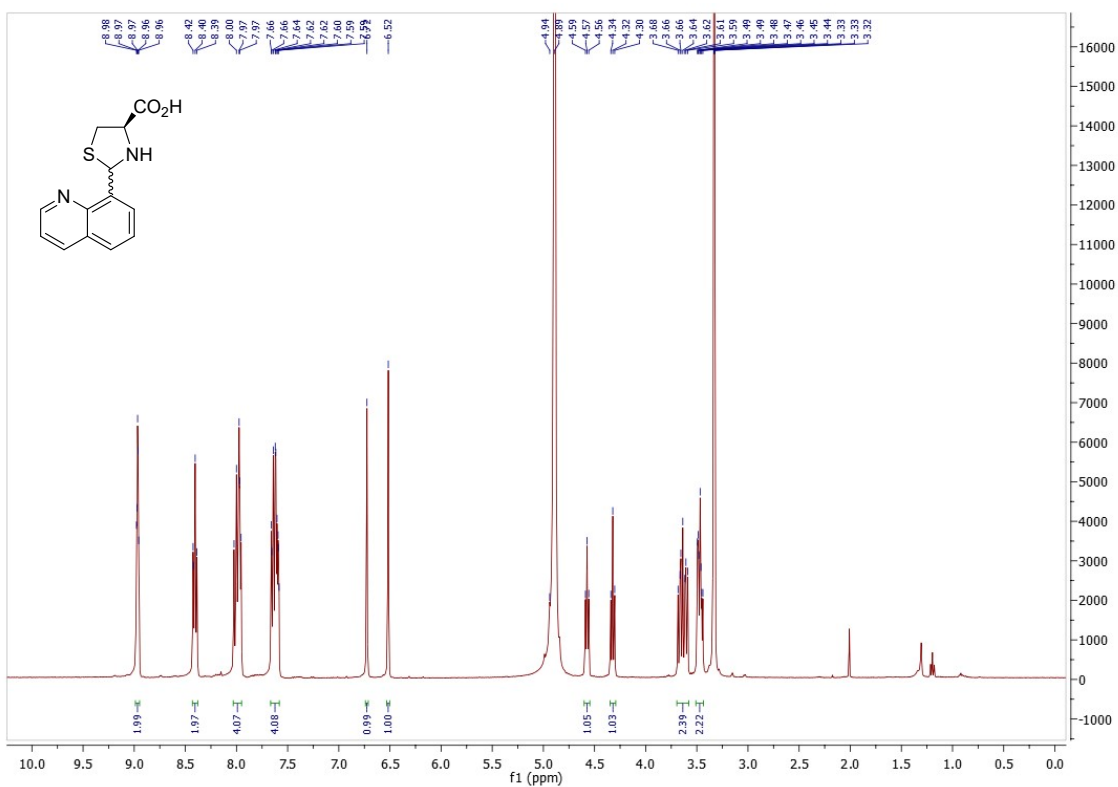

**Figure S4:**  $^1\text{H}$  NMR spectrum of compound **2e** (400 MHz,  $\text{CD}_3\text{OD}$ ).

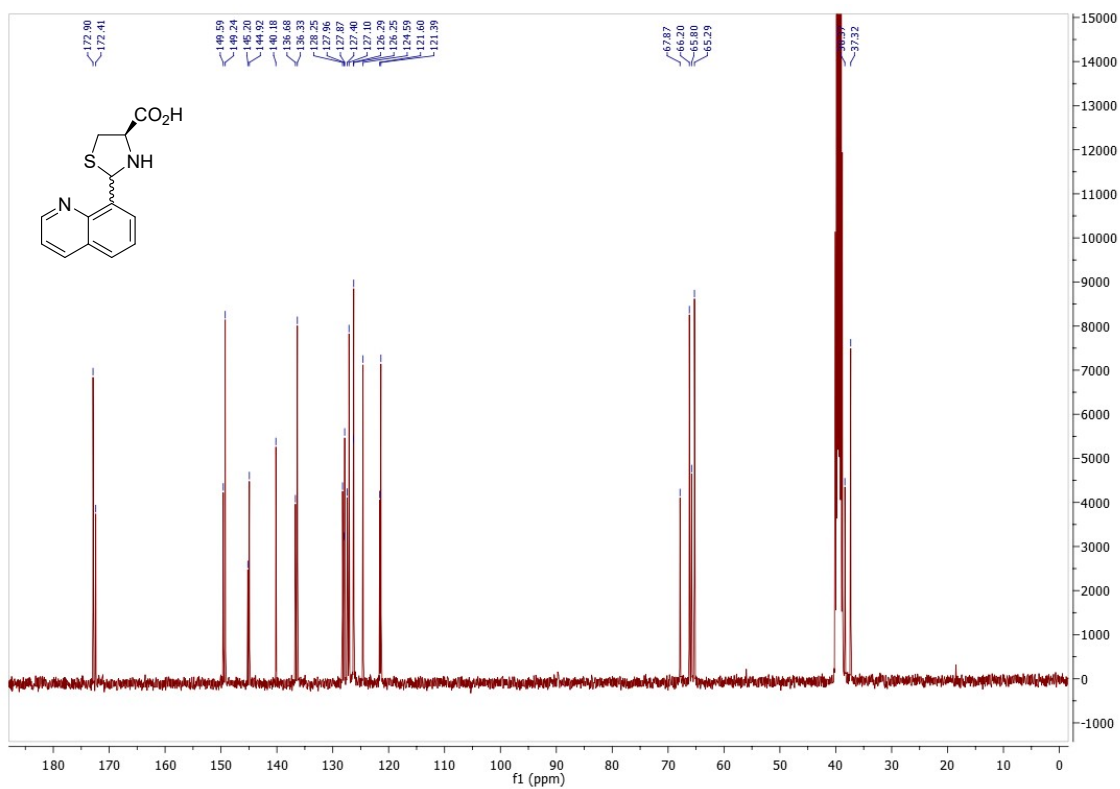

Figure S5: <sup>13</sup>C NMR spectrum of compound **2** (100 MHz, DMSO-*d*<sub>6</sub>).

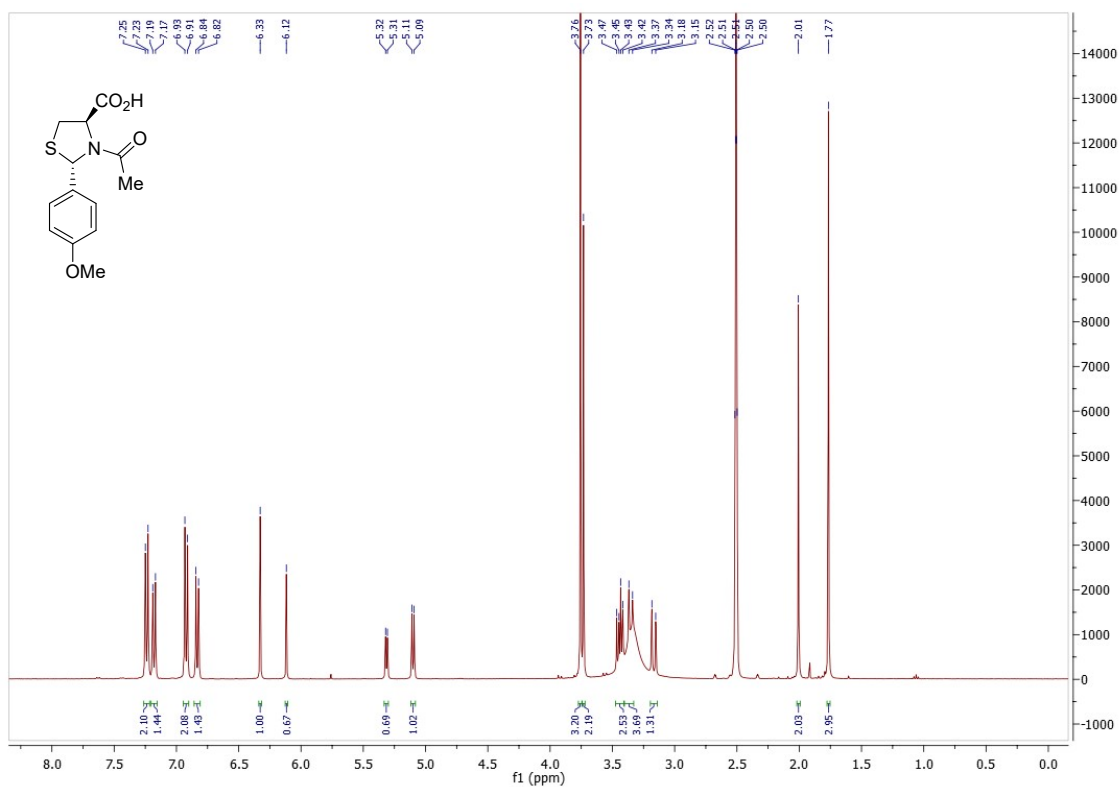

Figure S6: <sup>1</sup>H NMR spectrum of compound **5** (400 MHz, DMSO-*d*<sub>6</sub>).

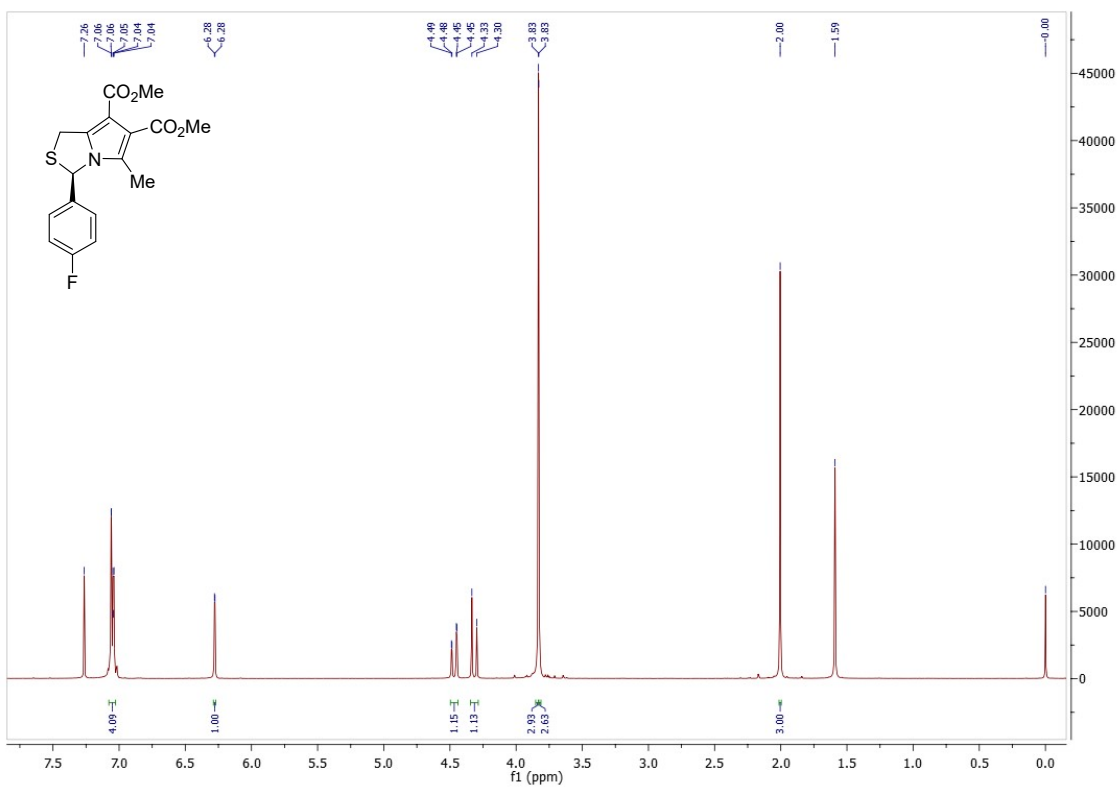

Figure S7: <sup>1</sup>H NMR spectrum of compound 3a (400 MHz, CDCl<sub>3</sub>).

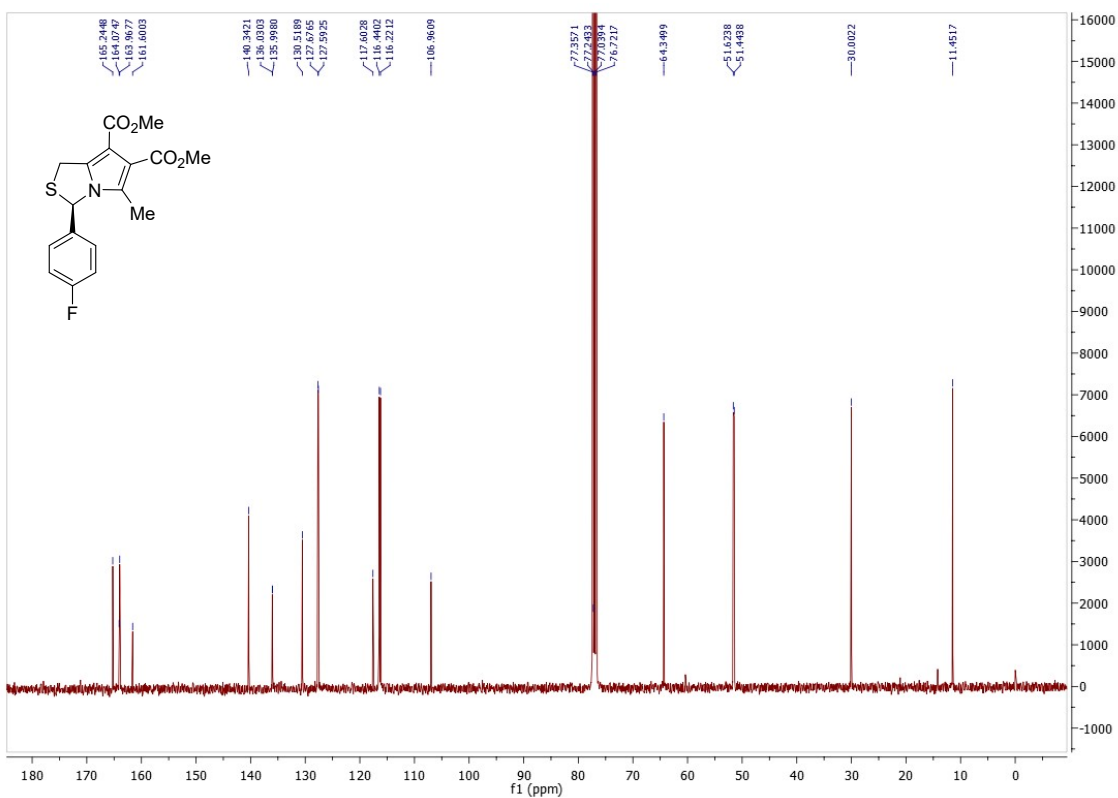

Figure S8: <sup>13</sup>C NMR spectrum of compound 3a (100 MHz, CDCl<sub>3</sub>).

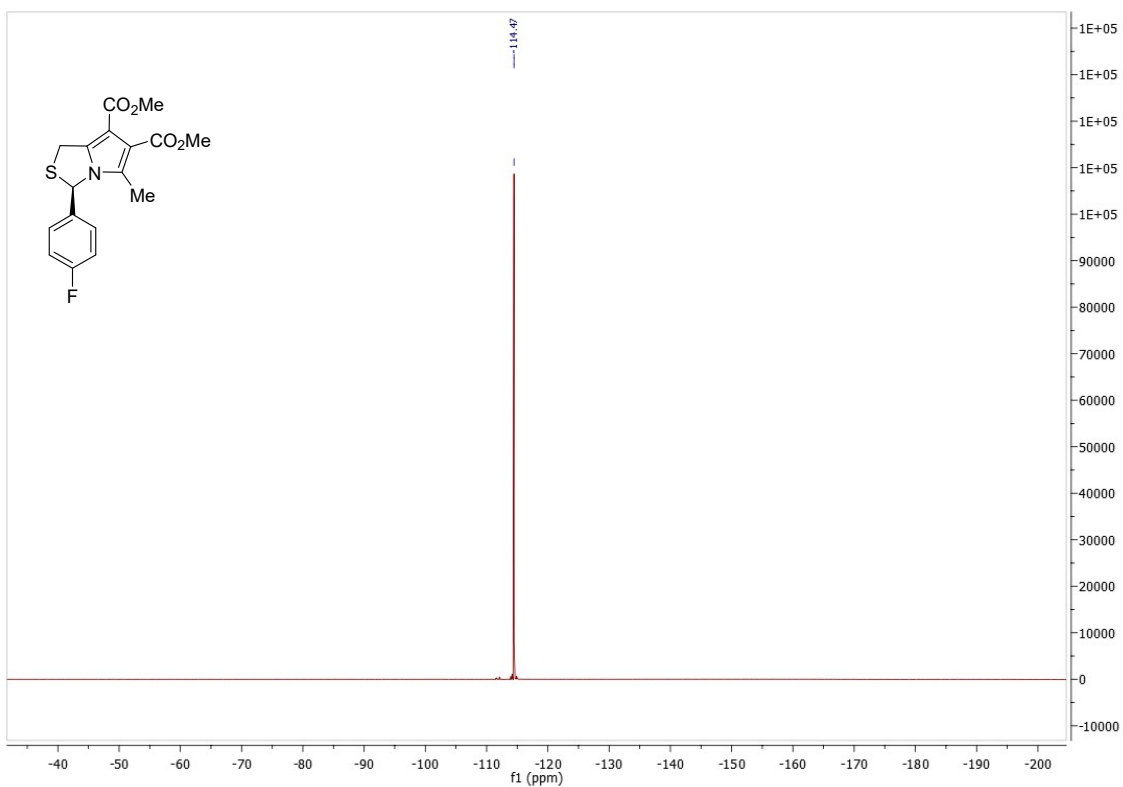

**Figure S9:**  $^{19}\text{F}$  NMR spectrum of compound 3a (376 MHz,  $\text{CDCl}_3$ ).

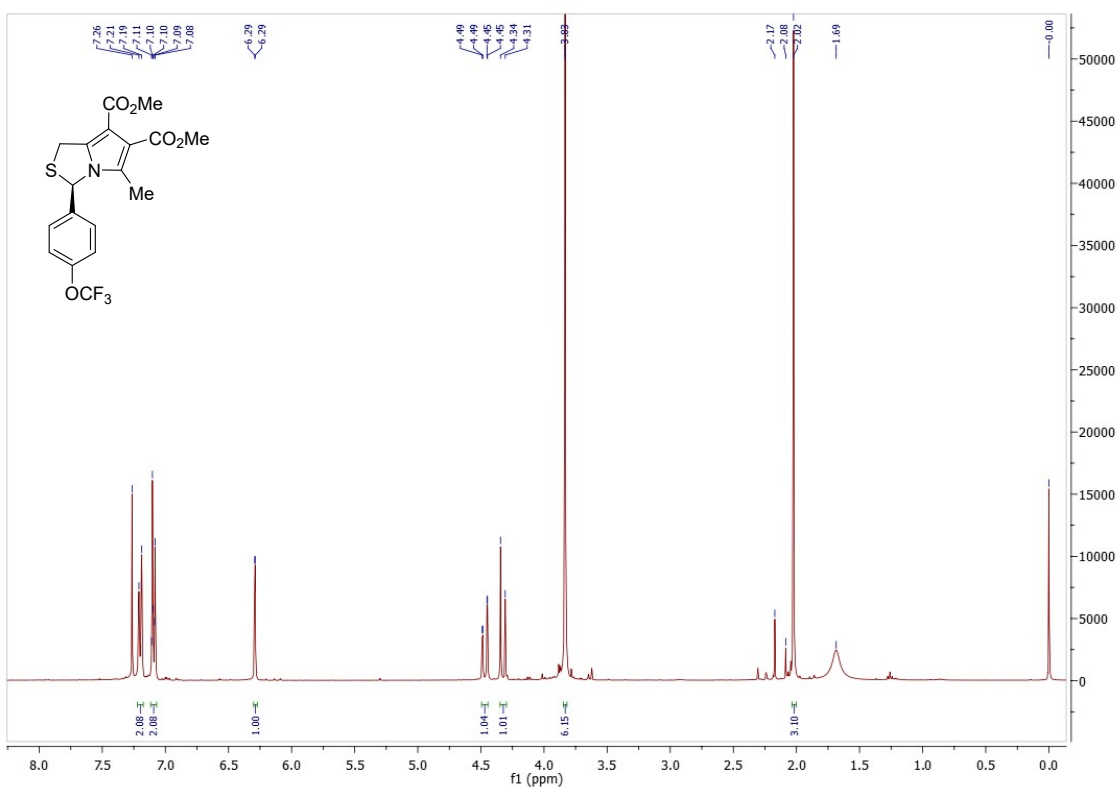

**Figure S10:**  $^1\text{H}$  NMR spectrum of compound 3b (400 MHz,  $\text{CDCl}_3$ ).

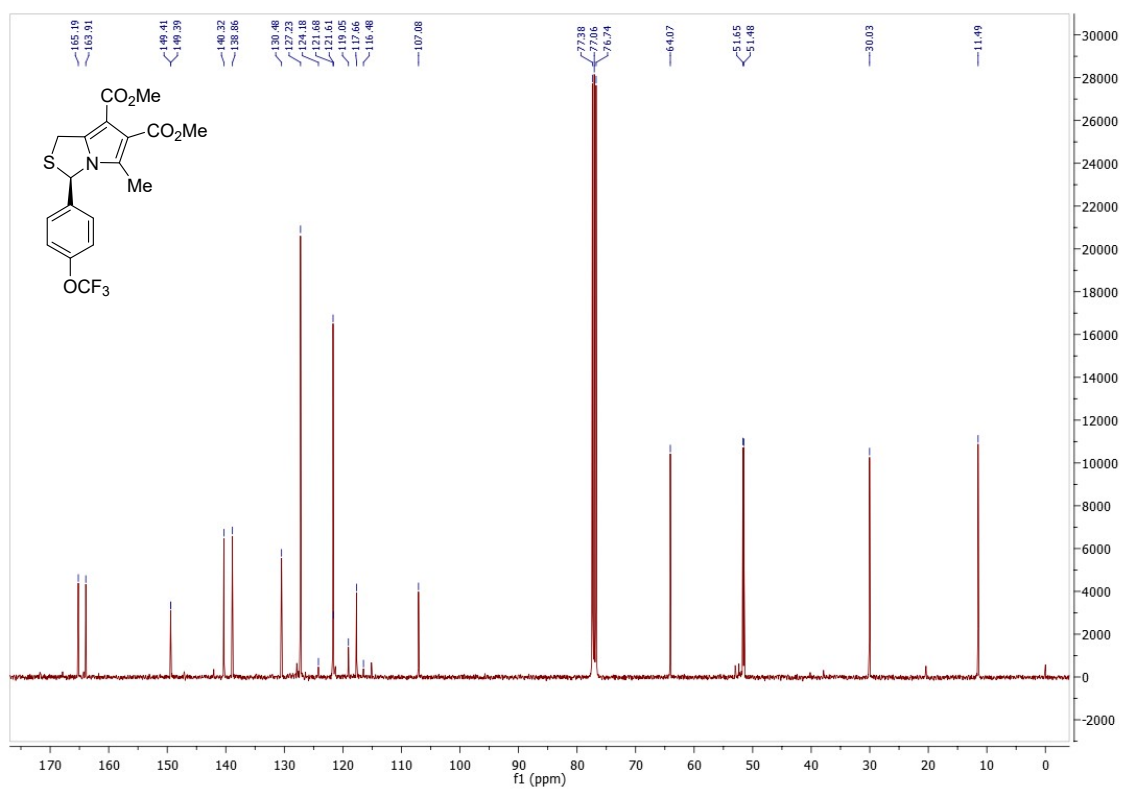

**Figure S11:**  $^{13}\text{C}$  NMR spectrum of compound **3b** (100 MHz,  $\text{CDCl}_3$ ).

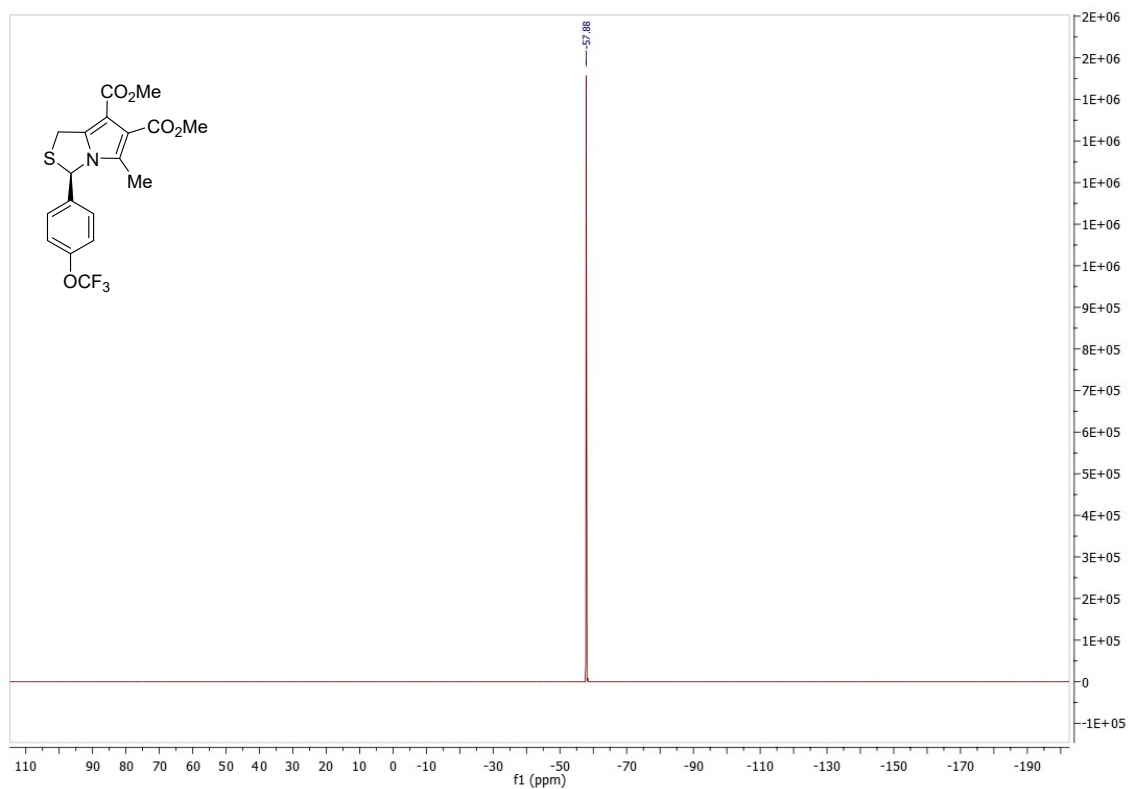

**Figure S12:**  $^{19}\text{F}$  NMR spectrum of compound **3b** (376 MHz,  $\text{CDCl}_3$ ).



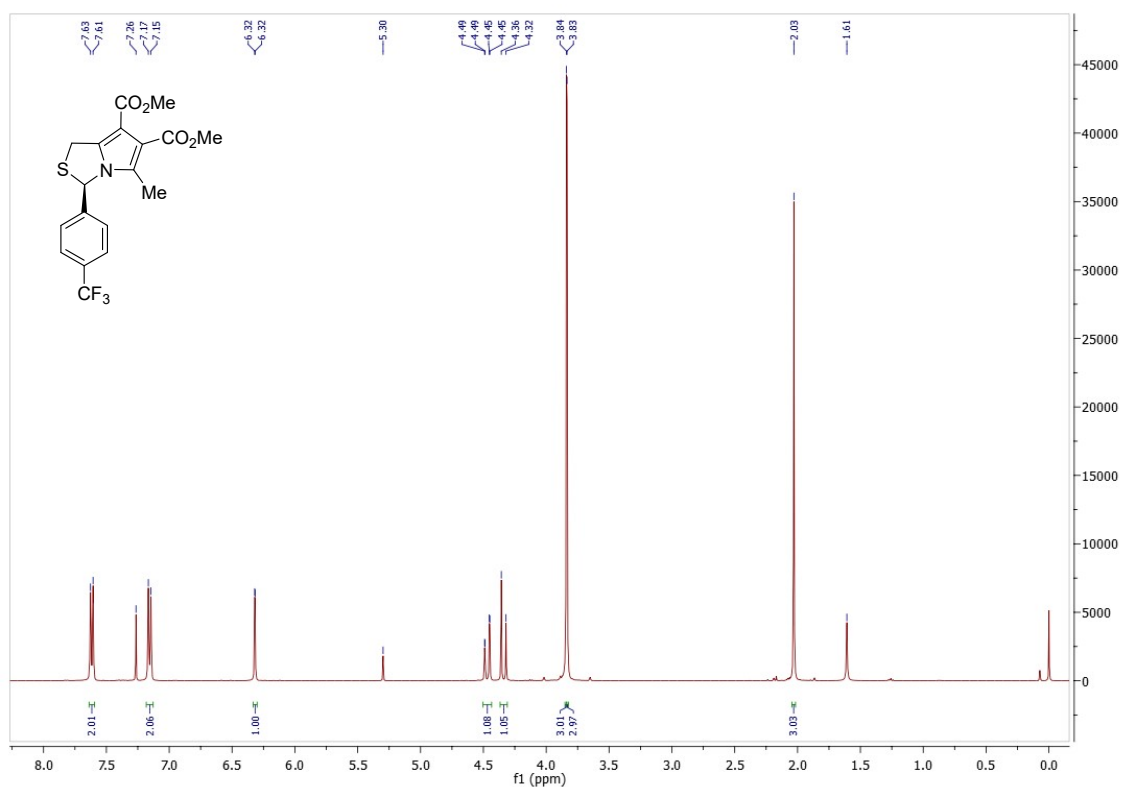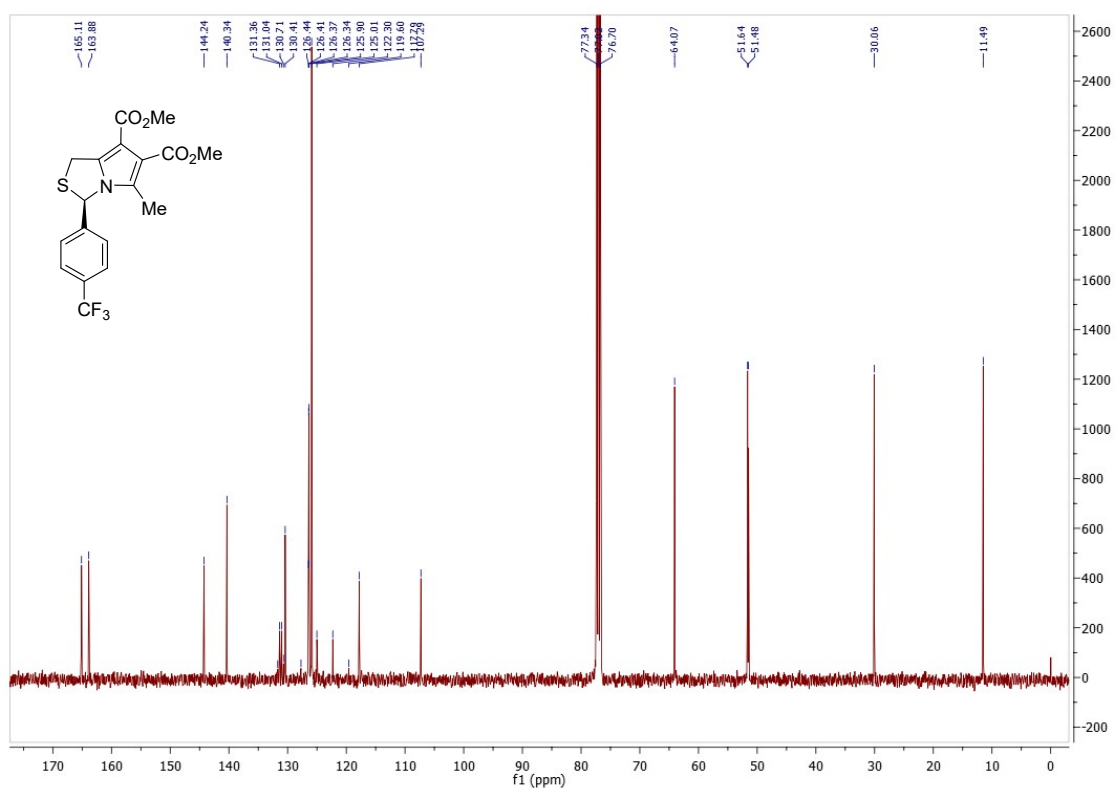

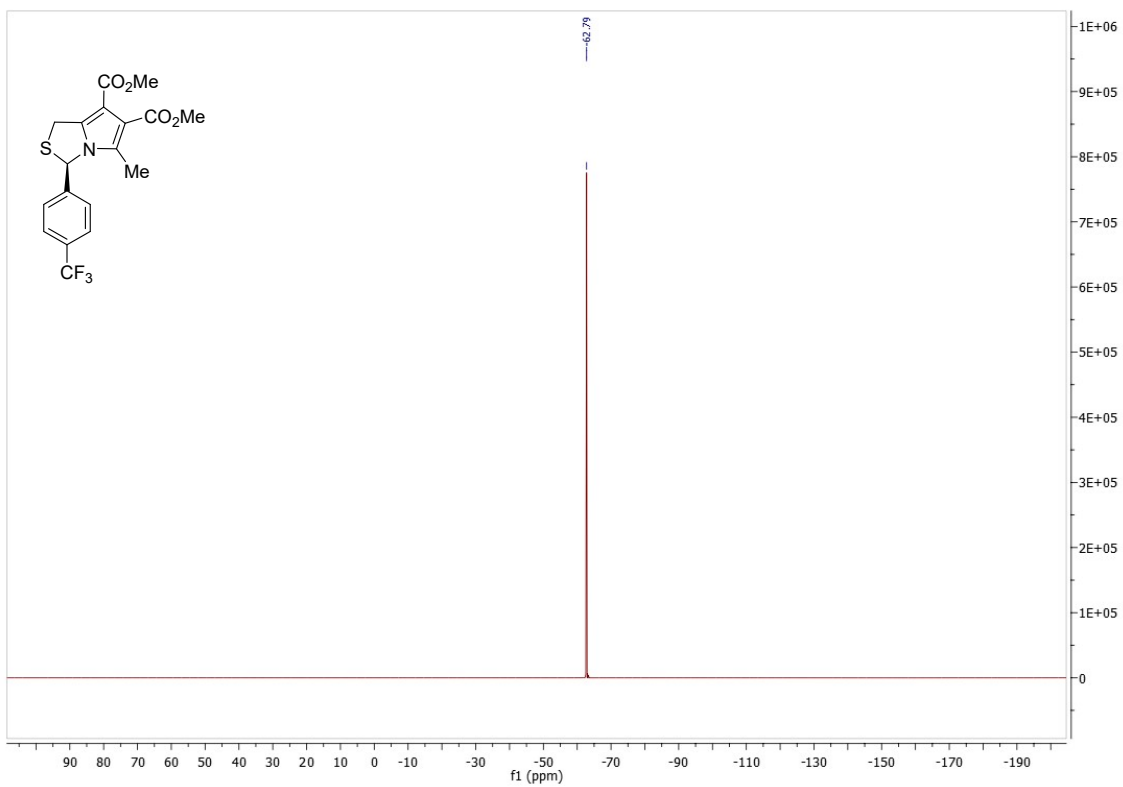

**Figure S15:**  $^{19}\text{F}$  NMR spectrum of compound **3c** (376 MHz,  $\text{CDCl}_3$ ).

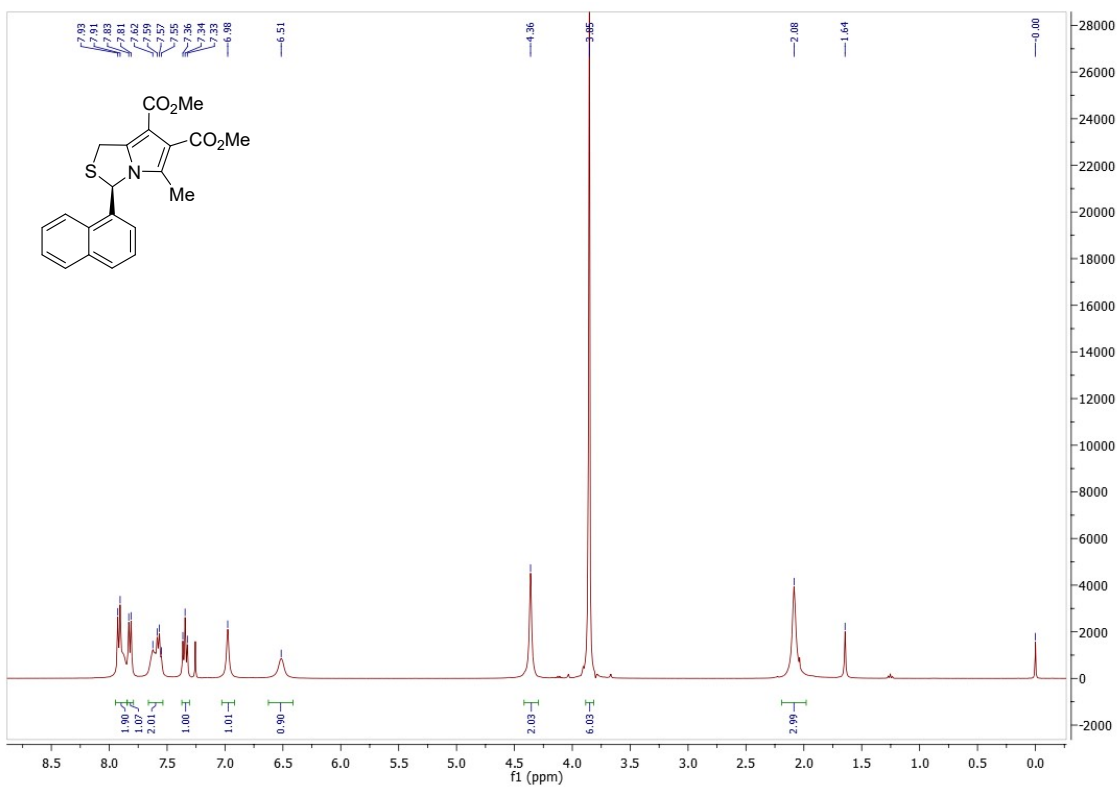

**Figure S16:**  $^1\text{H}$  NMR spectrum of compound **3d** (400 MHz,  $\text{CDCl}_3$ ).

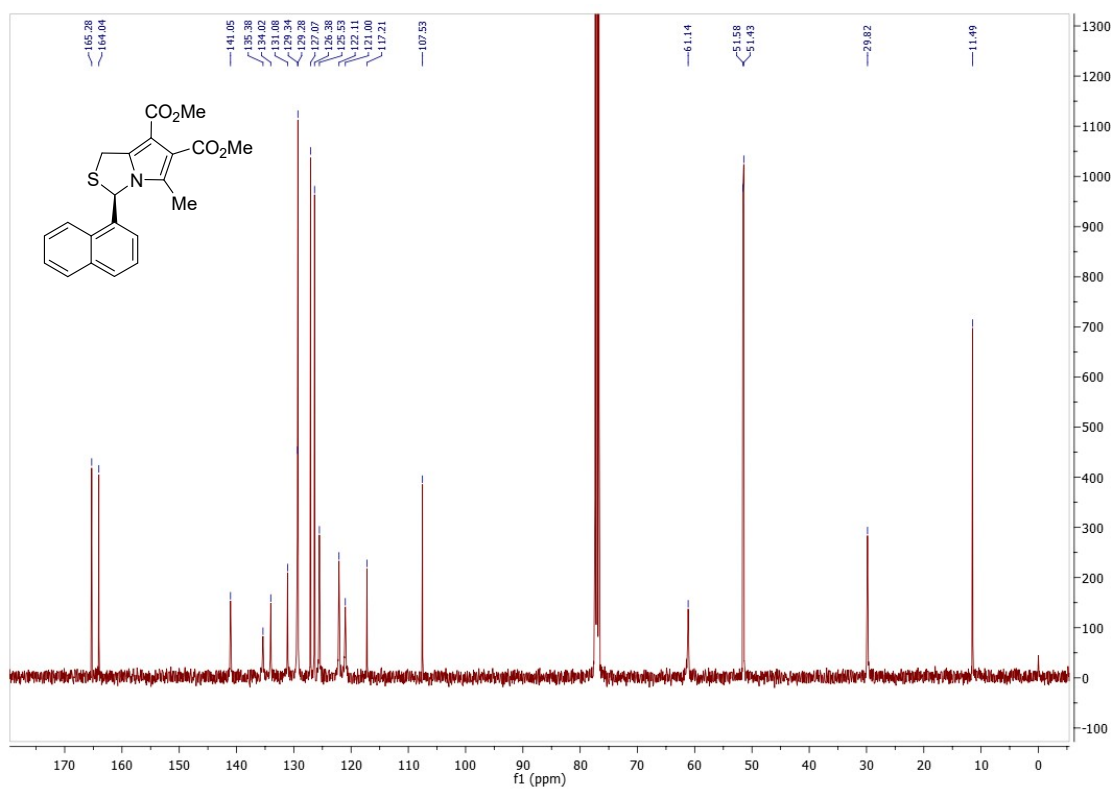

**Figure S17:**  $^{13}\text{C}$  NMR spectrum of compound **3d** (100 MHz,  $\text{CDCl}_3$ ).

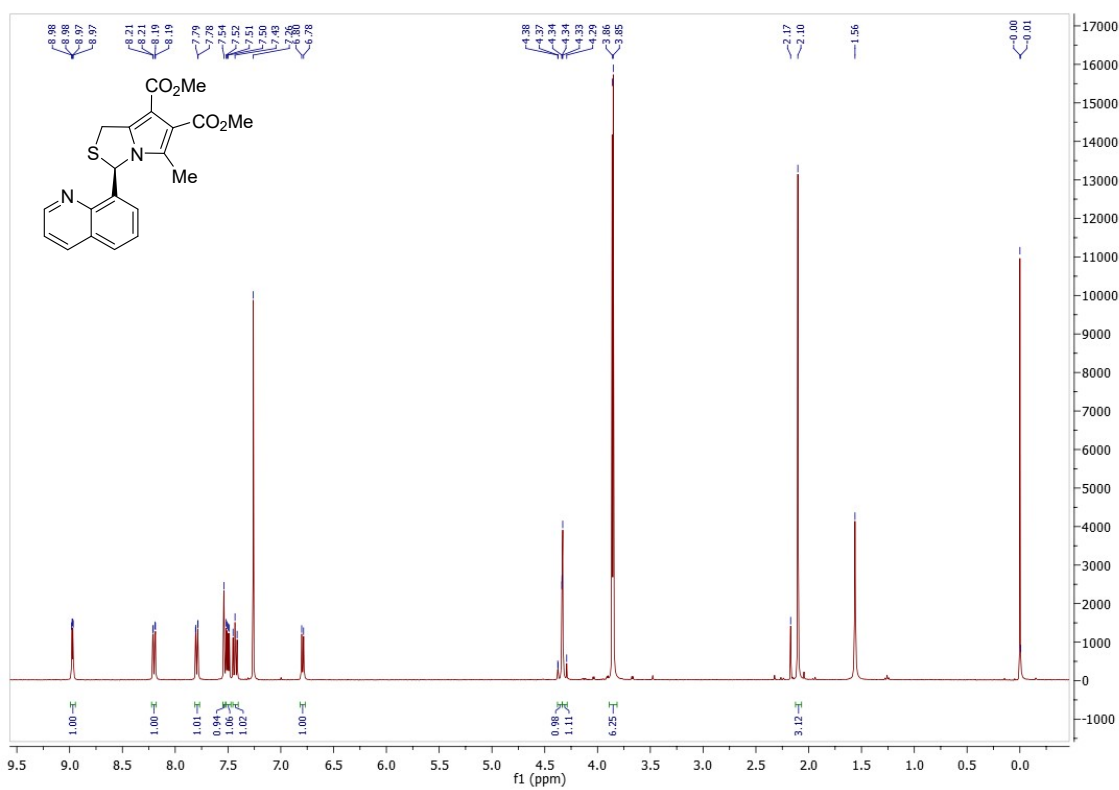

**Figure S18:**  $^1\text{H}$  NMR spectrum of compound **3e** (400 MHz,  $\text{CDCl}_3$ ).

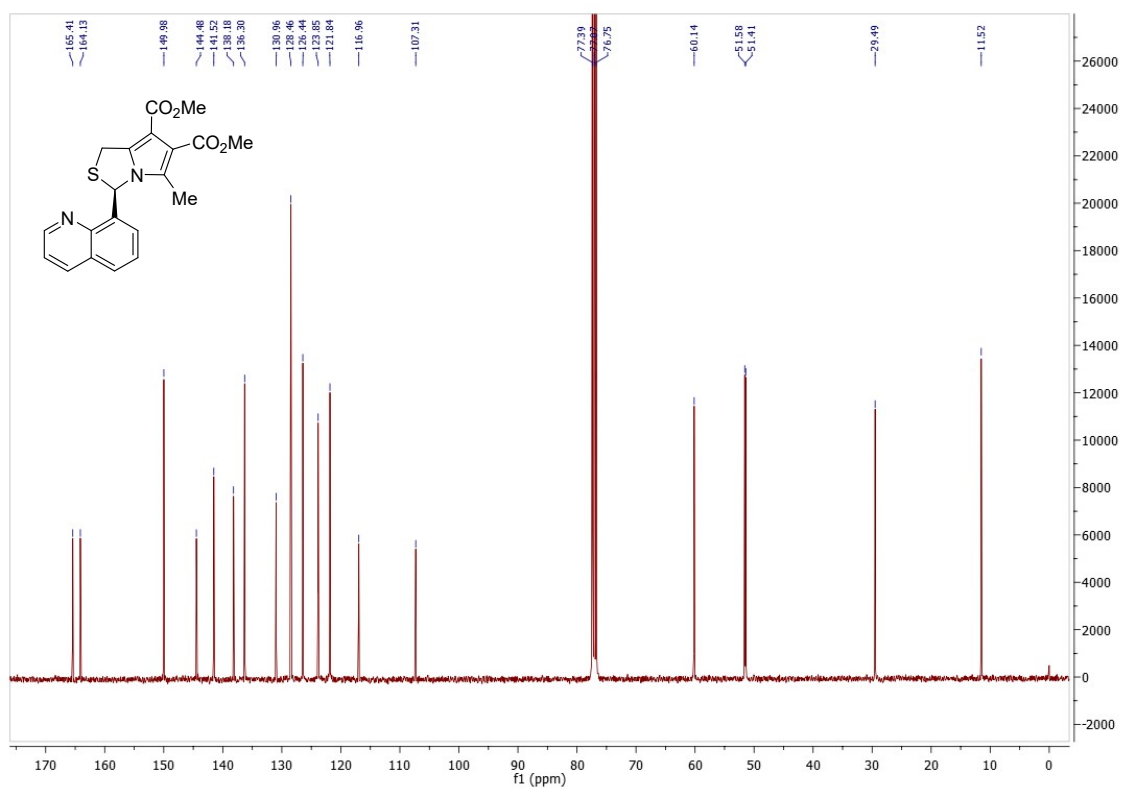

**Figure S19:** <sup>13</sup>C NMR spectrum of compound 3e (100 MHz, CDCl<sub>3</sub>).

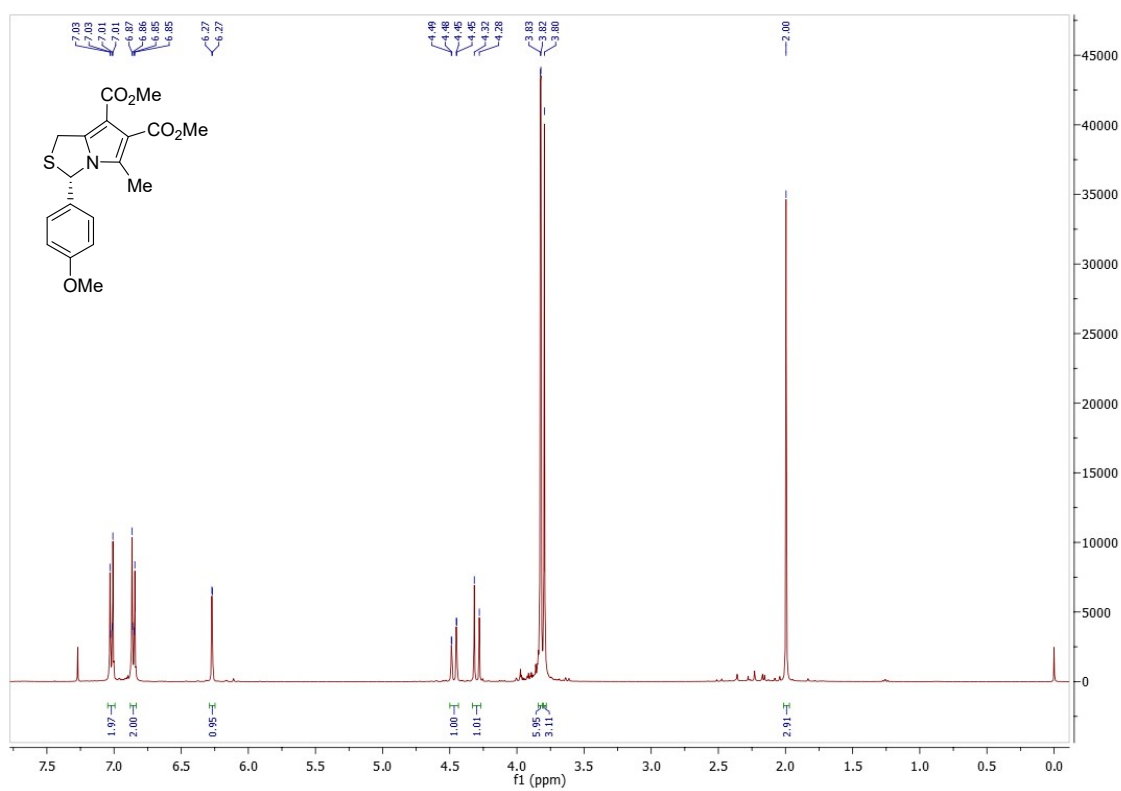

**Figure S20:** <sup>1</sup>H NMR spectrum of compound 6 (400 MHz, CDCl<sub>3</sub>).

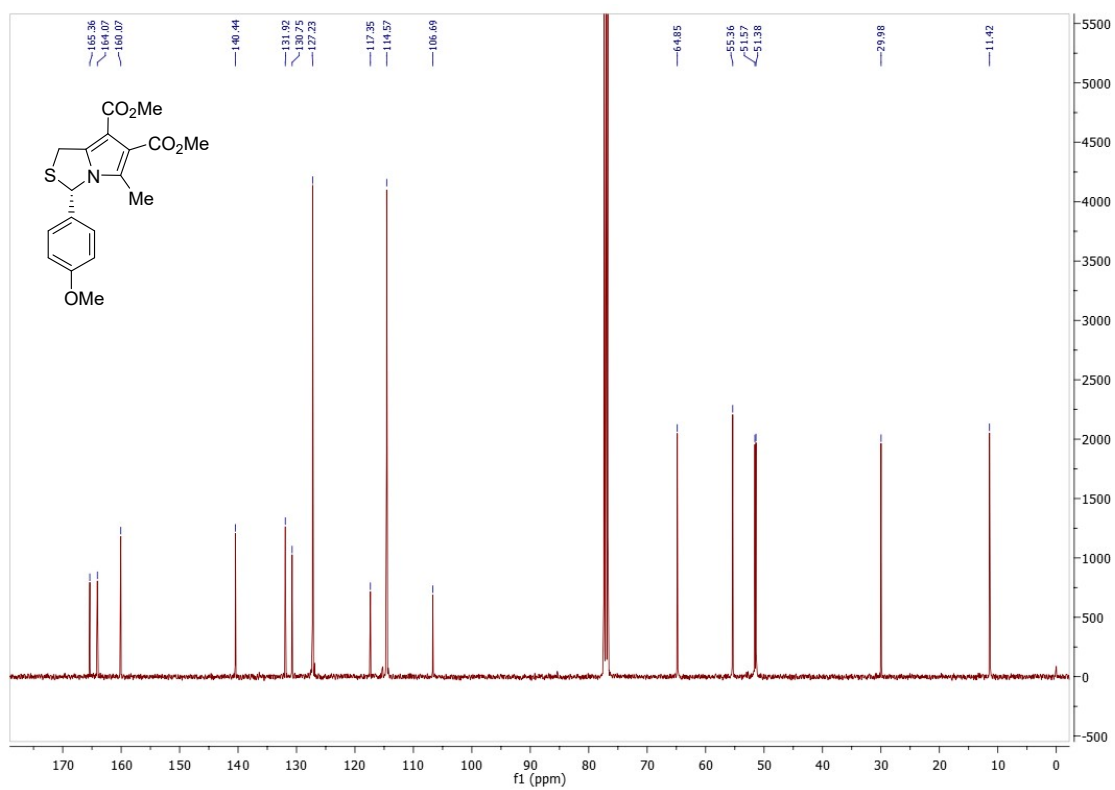

**Figure S21:** <sup>13</sup>C NMR spectrum of compound 6 (100 MHz, CDCl<sub>3</sub>).

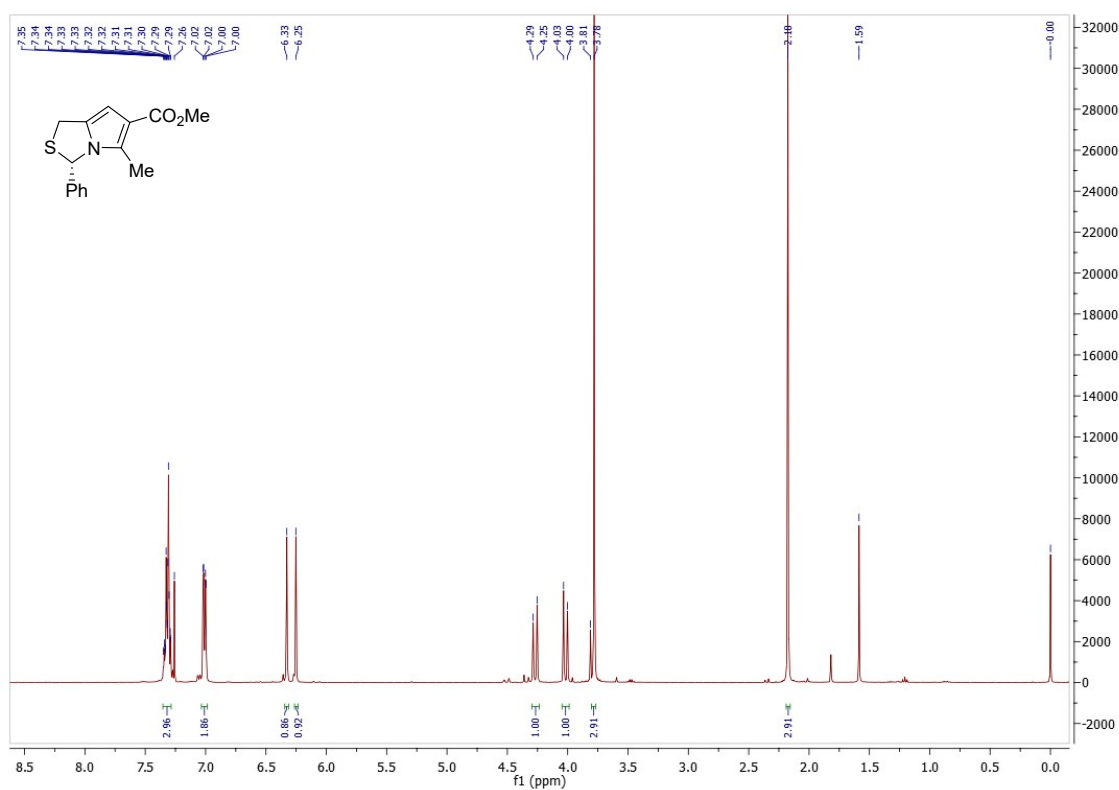

**Figure S22:** <sup>1</sup>H NMR spectrum of compound 10 (400 MHz, CDCl<sub>3</sub>).

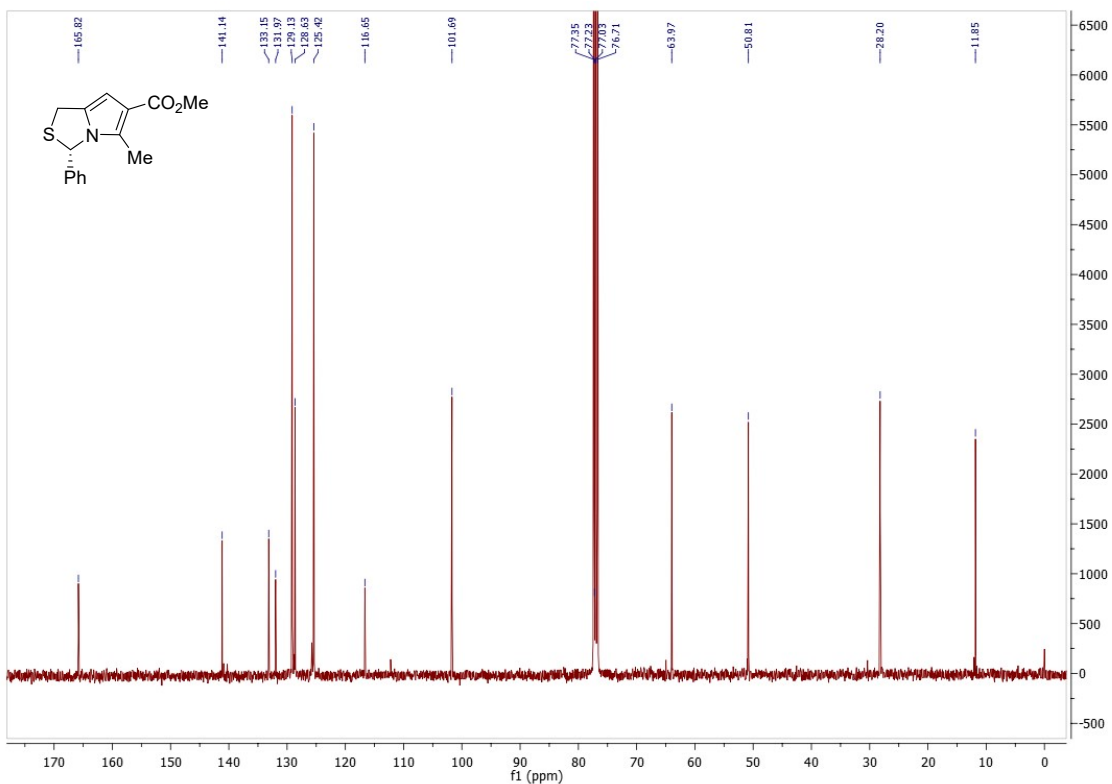

**Figure S23:**  $^{13}\text{C}$  NMR spectrum of compound **10** (100 MHz,  $\text{CDCl}_3$ ).

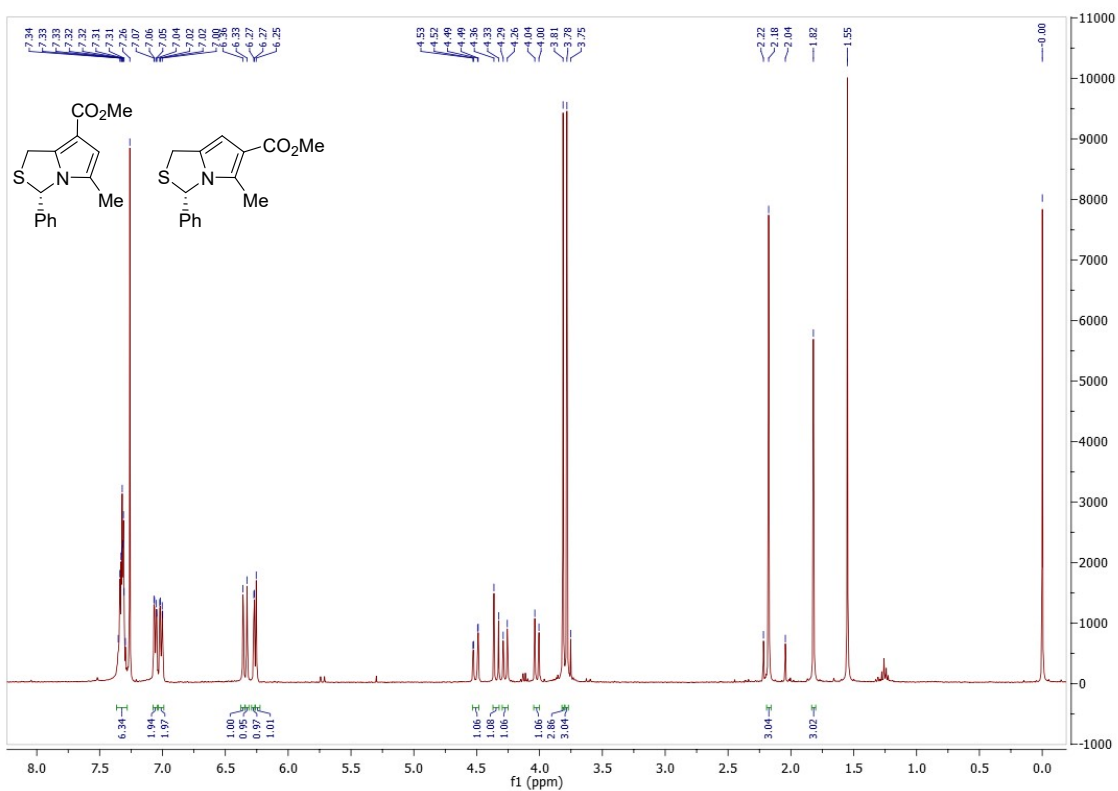

**Figure S24:**  $^1\text{H}$  NMR spectrum of the mixture of compounds **9** and **10** (400 MHz,  $\text{CDCl}_3$ ).

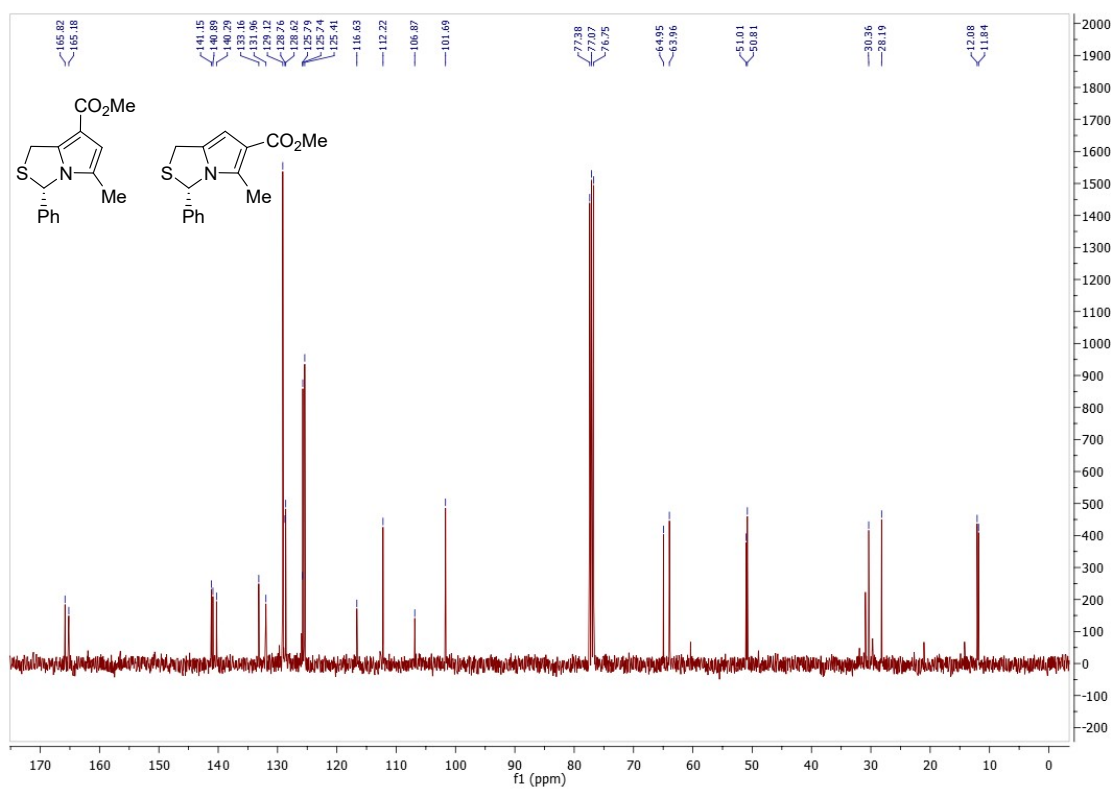

Figure S25:  $^{13}\text{C}$  NMR spectrum of the mixture of compounds **9** and **10** (100 MHz,  $\text{CDCl}_3$ ).

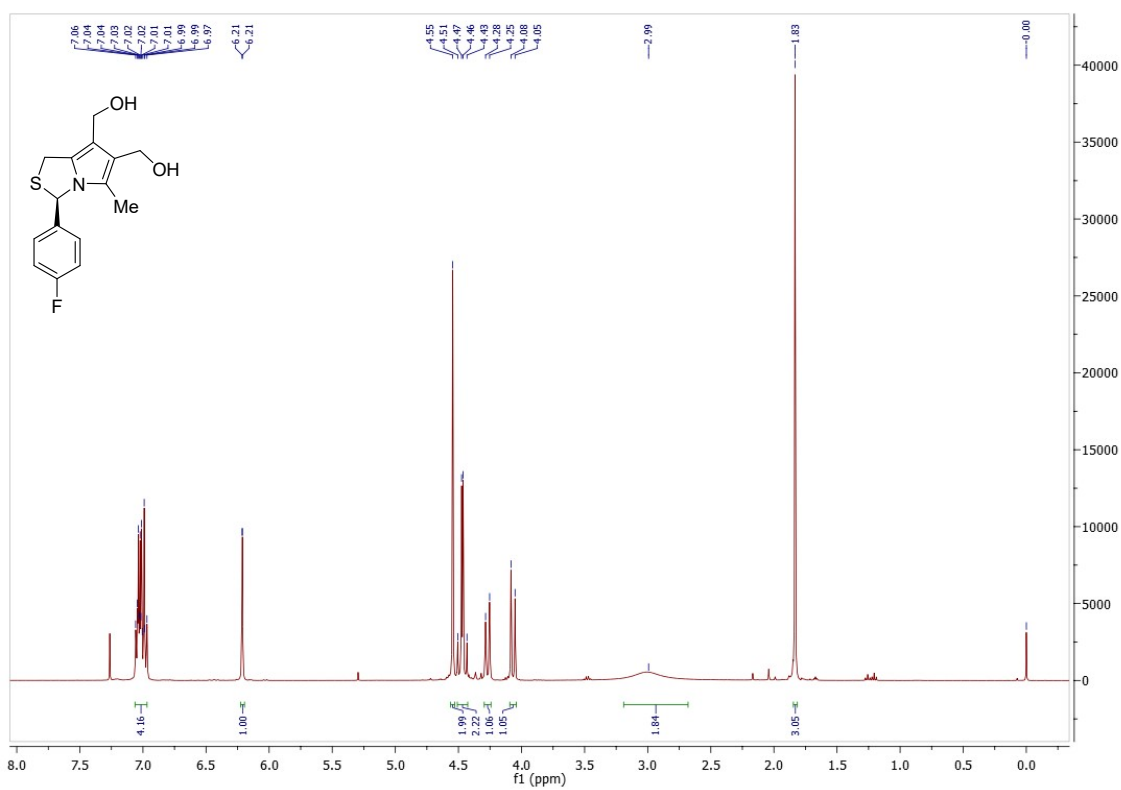

Figure S26:  $^1\text{H}$  NMR spectrum of compound **4a** (400 MHz,  $\text{CDCl}_3$ ).

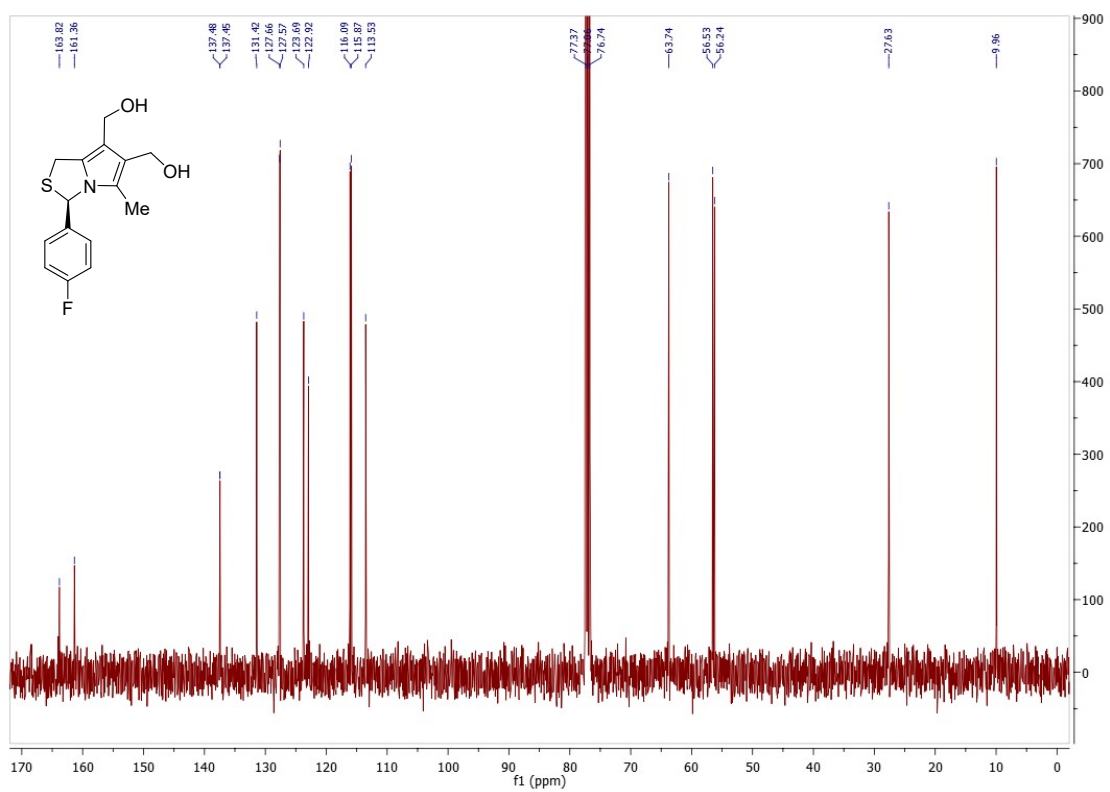

**Figure S27:**  $^{13}\text{C}$  NMR spectrum of compound **4a** (100 MHz,  $\text{CDCl}_3$ ).

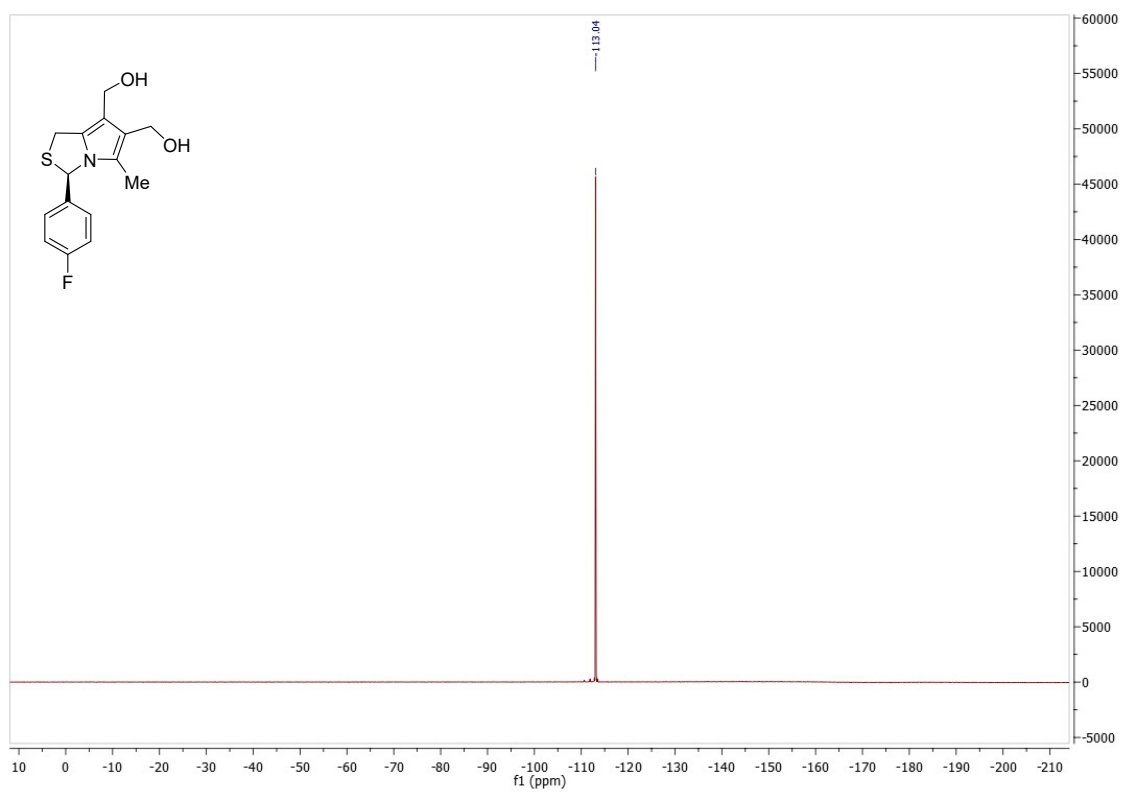

**Figure S28:**  $^{19}\text{F}$  NMR spectrum of compound **4a** (376 MHz,  $\text{CDCl}_3$ ).



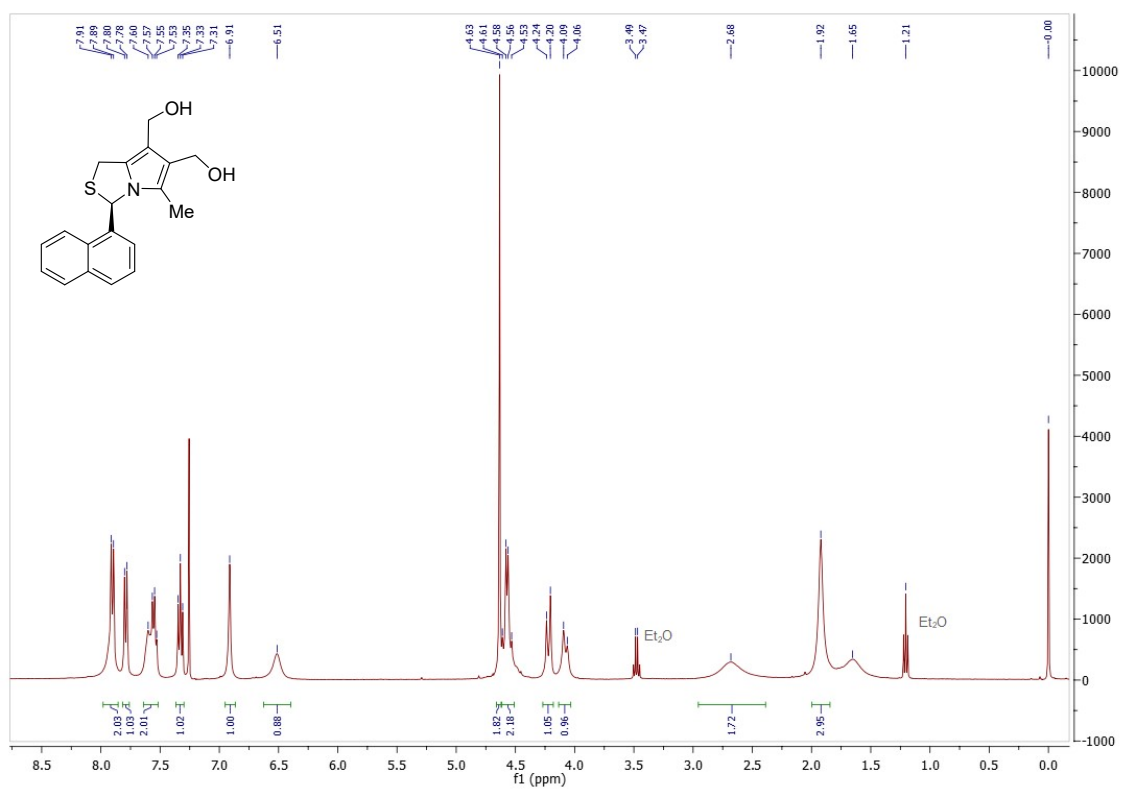

**Figure S29:** <sup>1</sup>H NMR spectrum of compound **4d** (400 MHz, CDCl<sub>3</sub>).

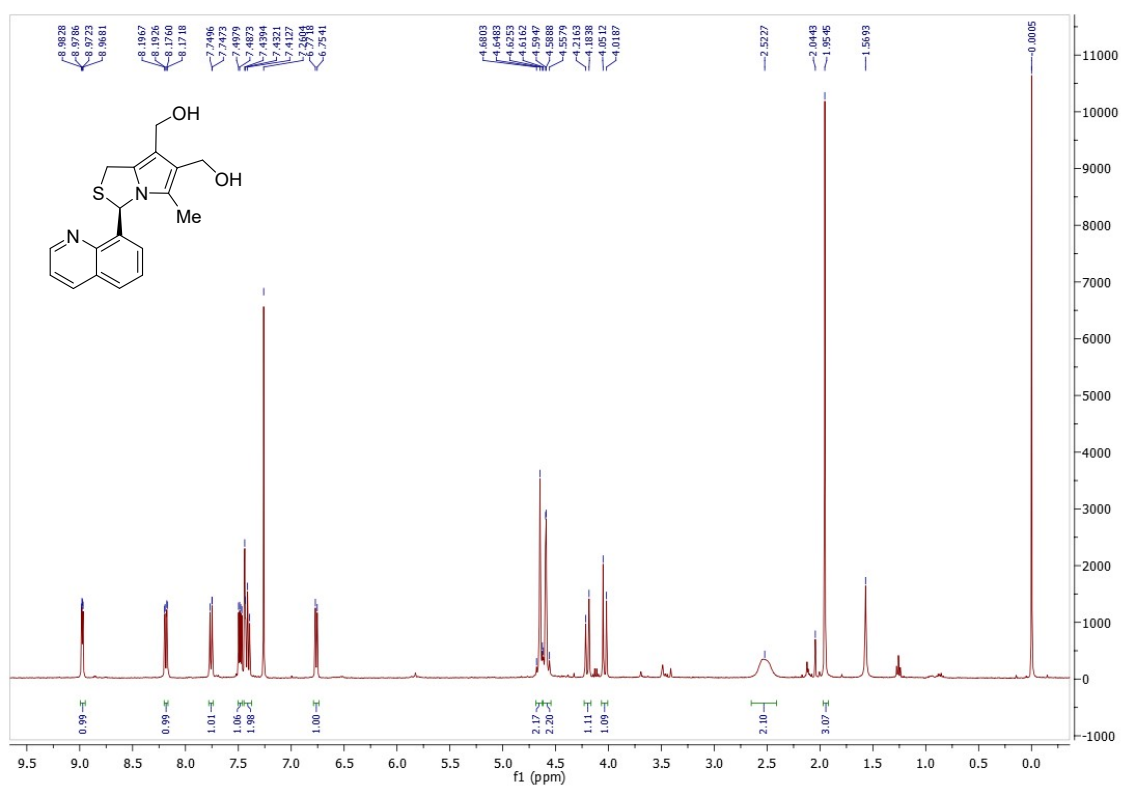

**Figure S30:** <sup>1</sup>H NMR spectrum of compound **4e** (400 MHz, CDCl<sub>3</sub>).

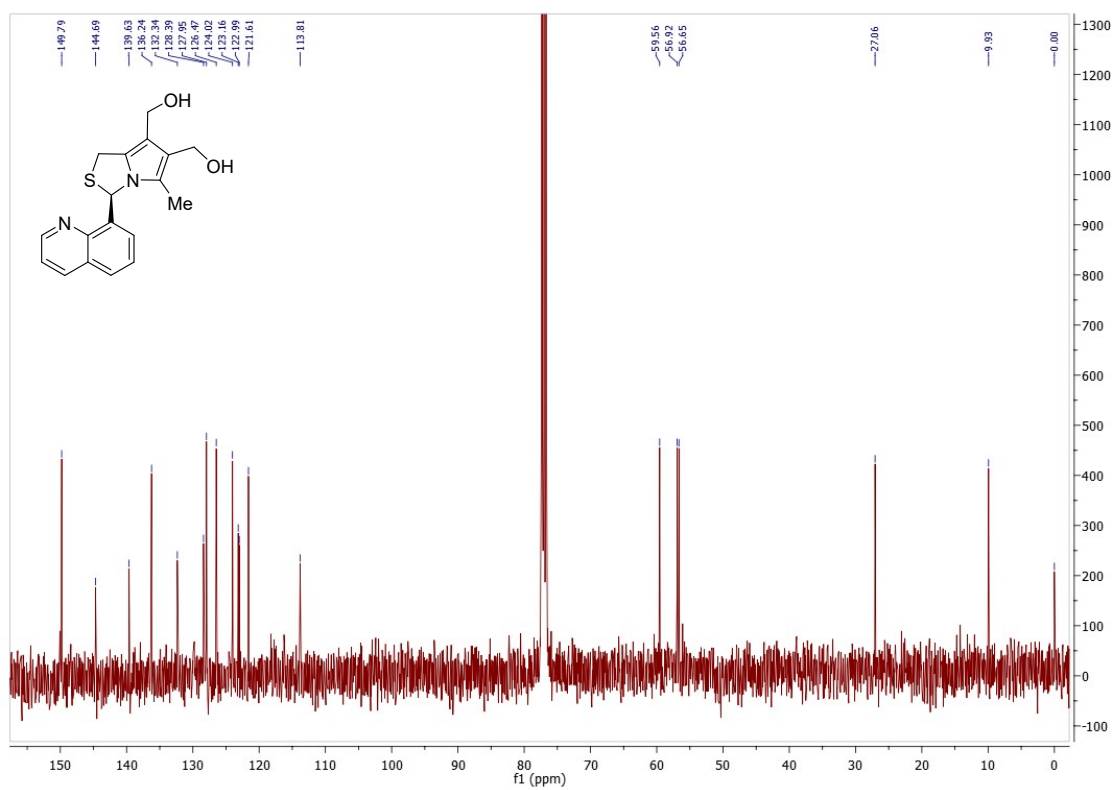

**Figure S31:** <sup>13</sup>C NMR spectrum of compound 4e (100 MHz, CDCl<sub>3</sub>).

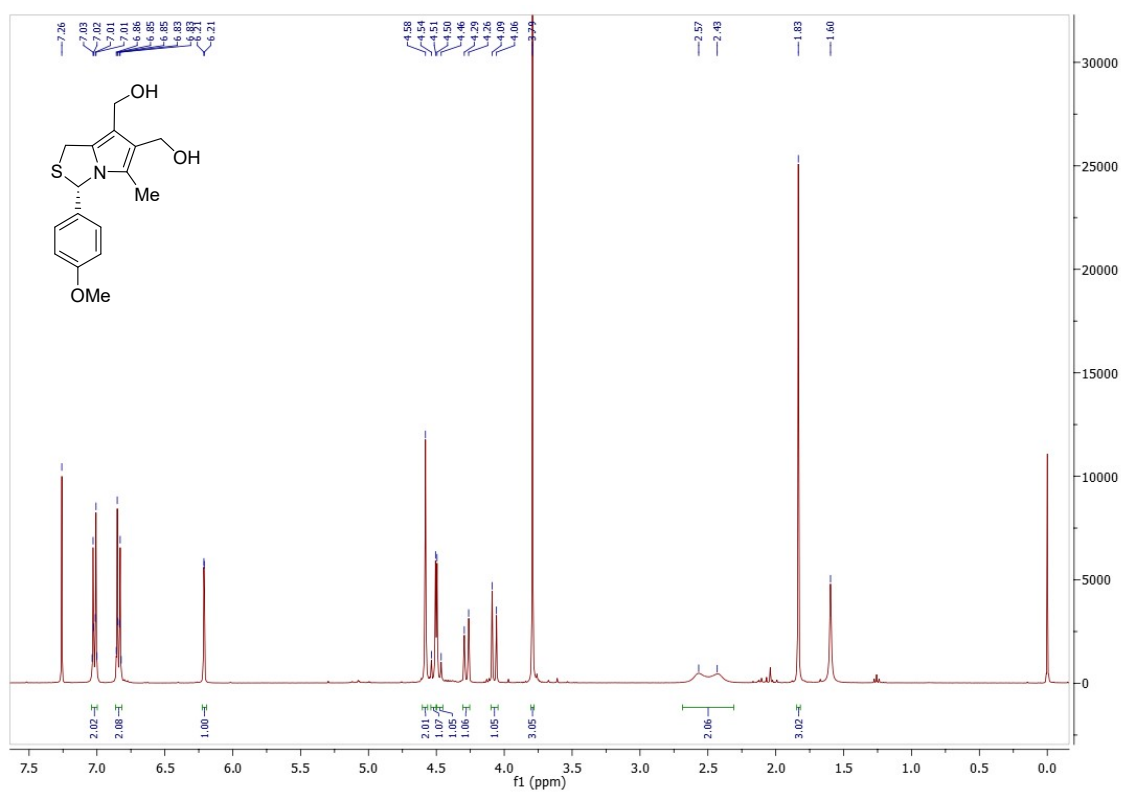

**Figure S32:** <sup>1</sup>H NMR spectrum of compound 7 (400 MHz, CDCl<sub>3</sub>).

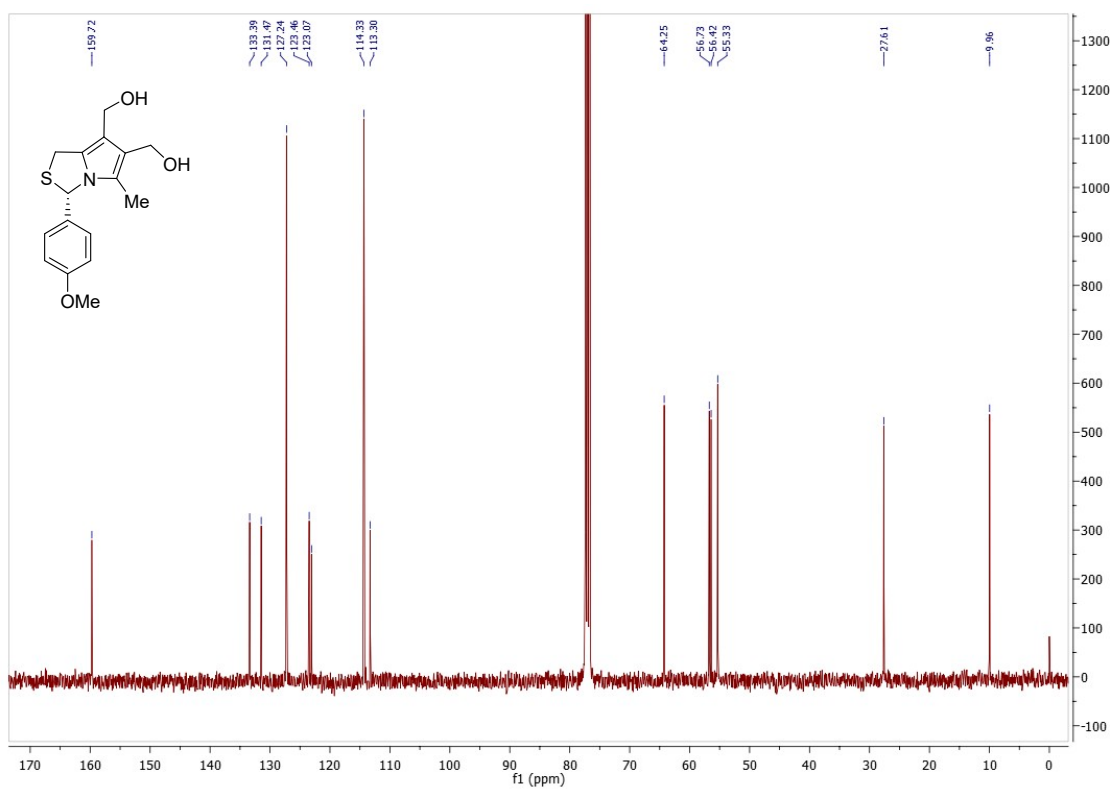

**Figure S33:**  $^{13}\text{C}$  NMR spectrum of compound **7** (100 MHz,  $\text{CDCl}_3$ ).

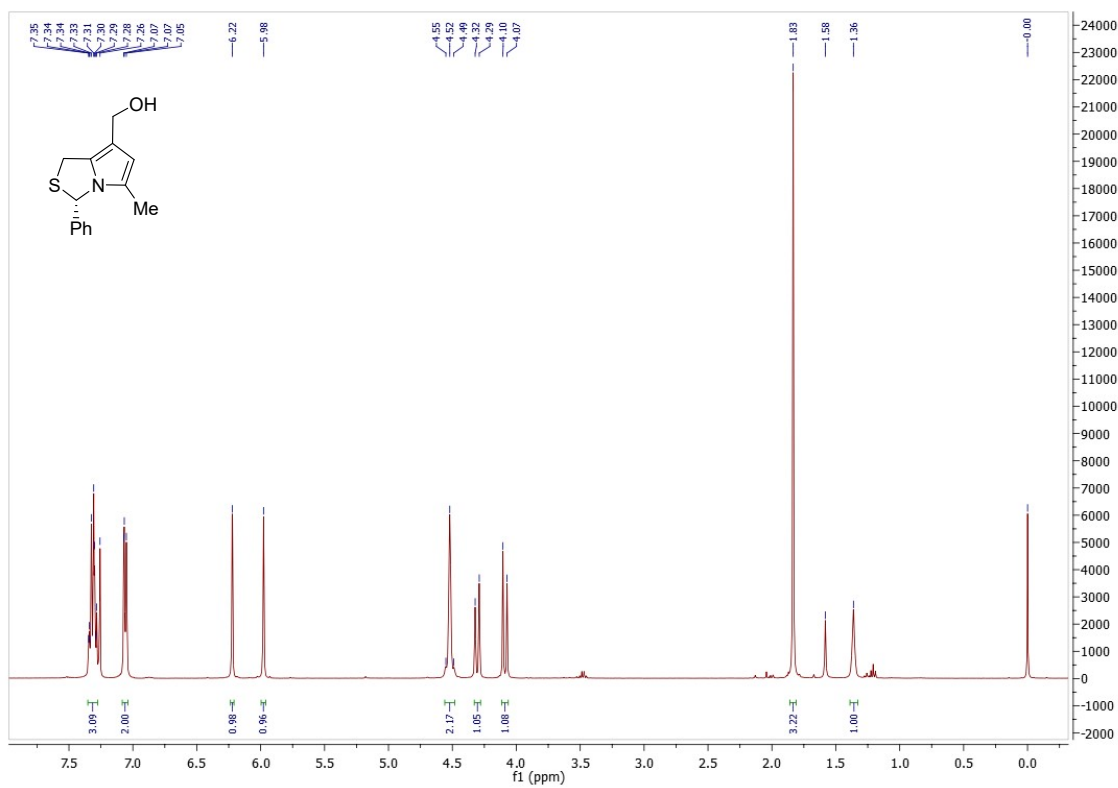

**Figure S34:**  $^1\text{H}$  NMR spectrum of compound **11** (400 MHz,  $\text{CDCl}_3$ ).

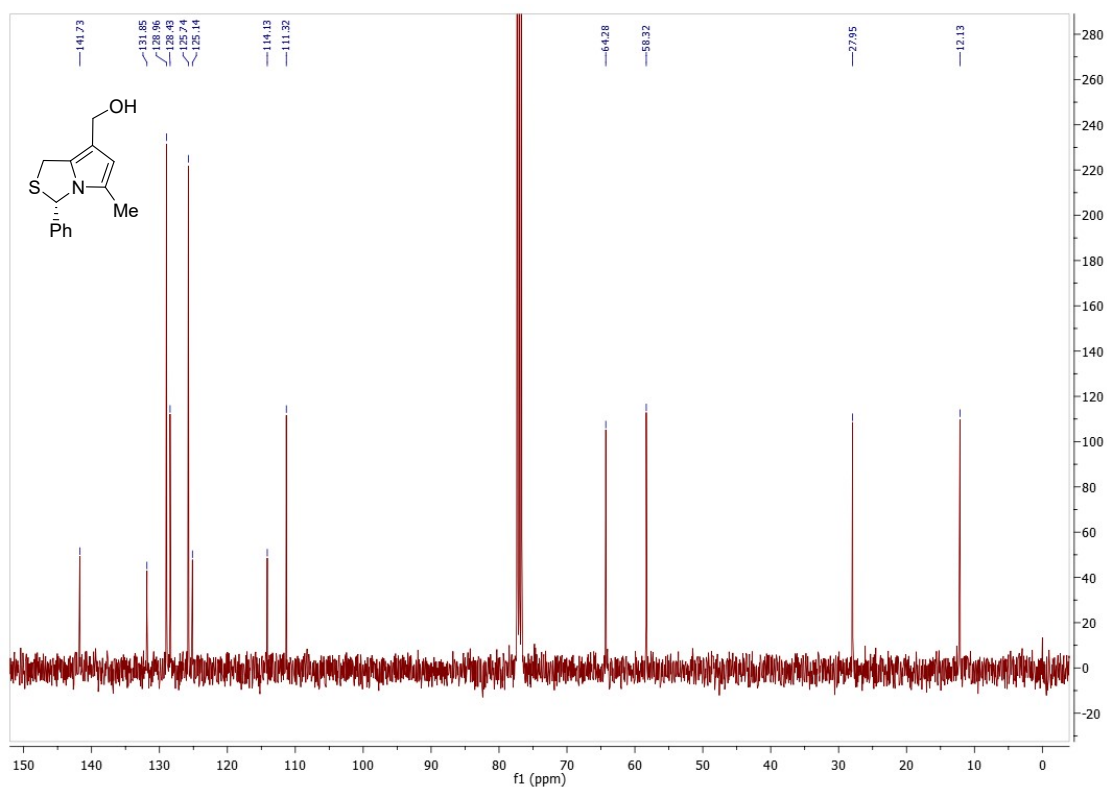

**Figure S35:**  $^{13}\text{C}$  NMR spectrum of compound **11** (100 MHz,  $\text{CDCl}_3$ ).

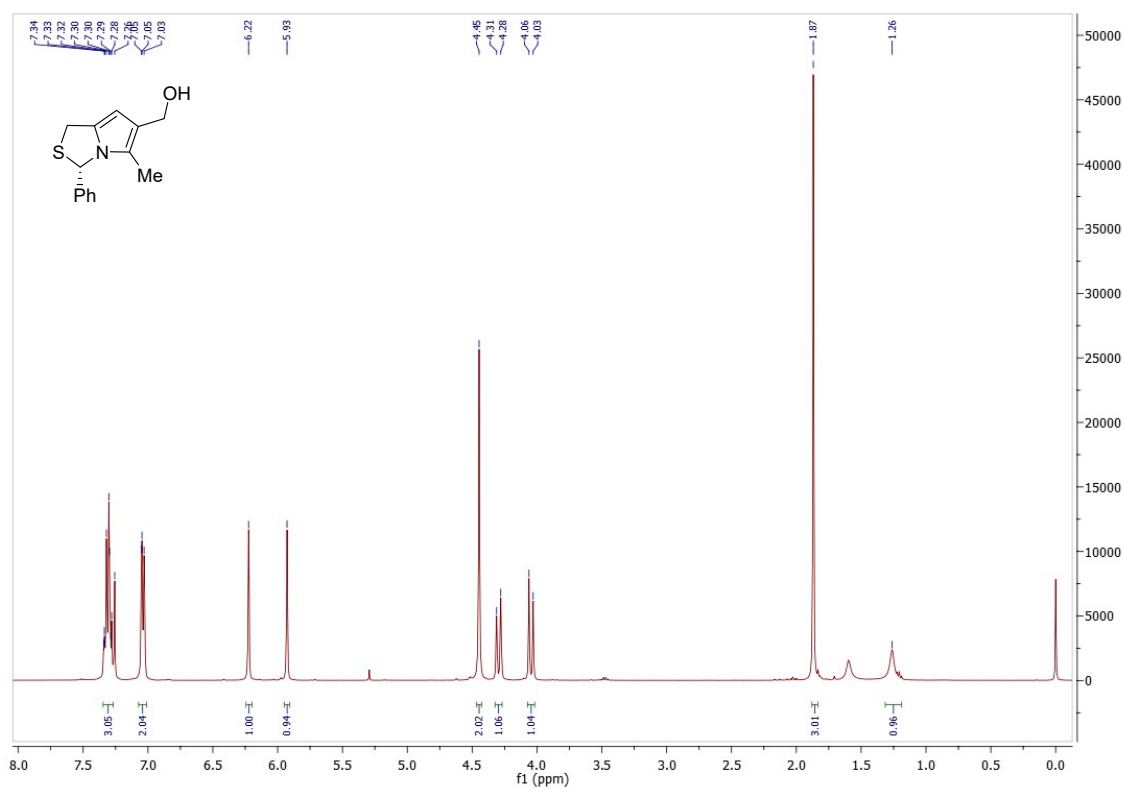

**Figure S36:**  $^1\text{H}$  NMR spectrum of compound **12** (400 MHz,  $\text{CDCl}_3$ ).

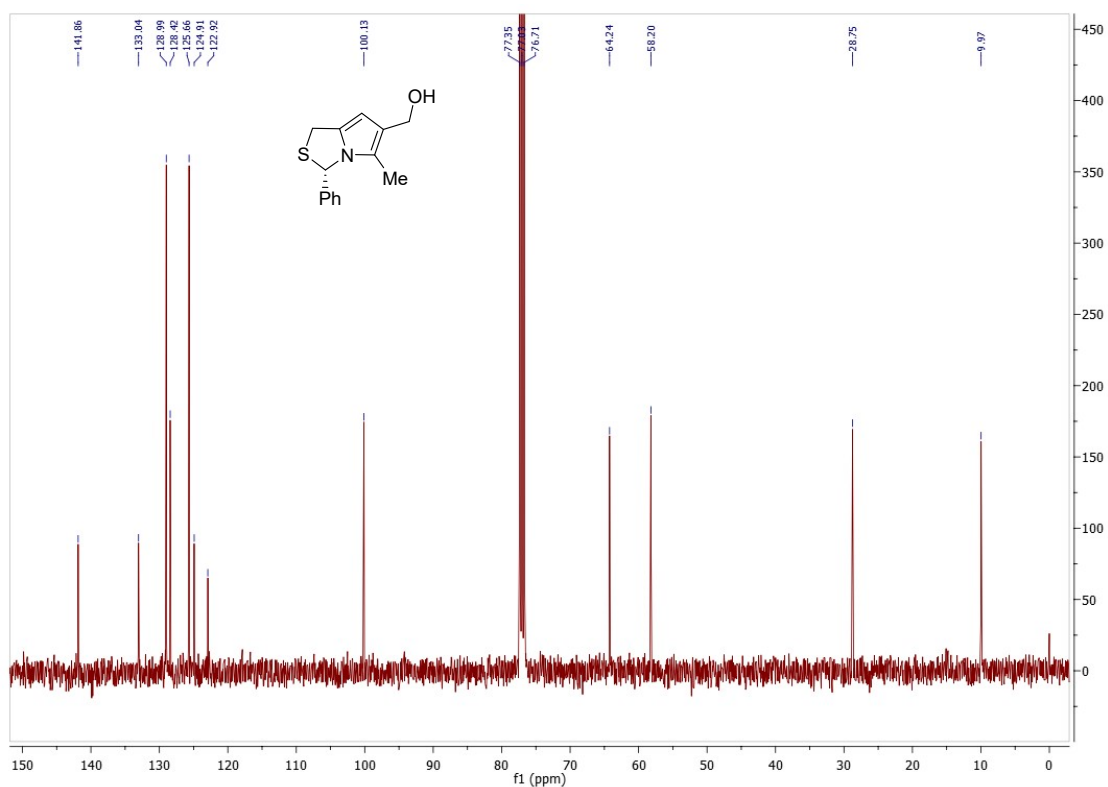

**Figure S37:** <sup>13</sup>C NMR spectrum of compound **12** (100 MHz, CDCl<sub>3</sub>).

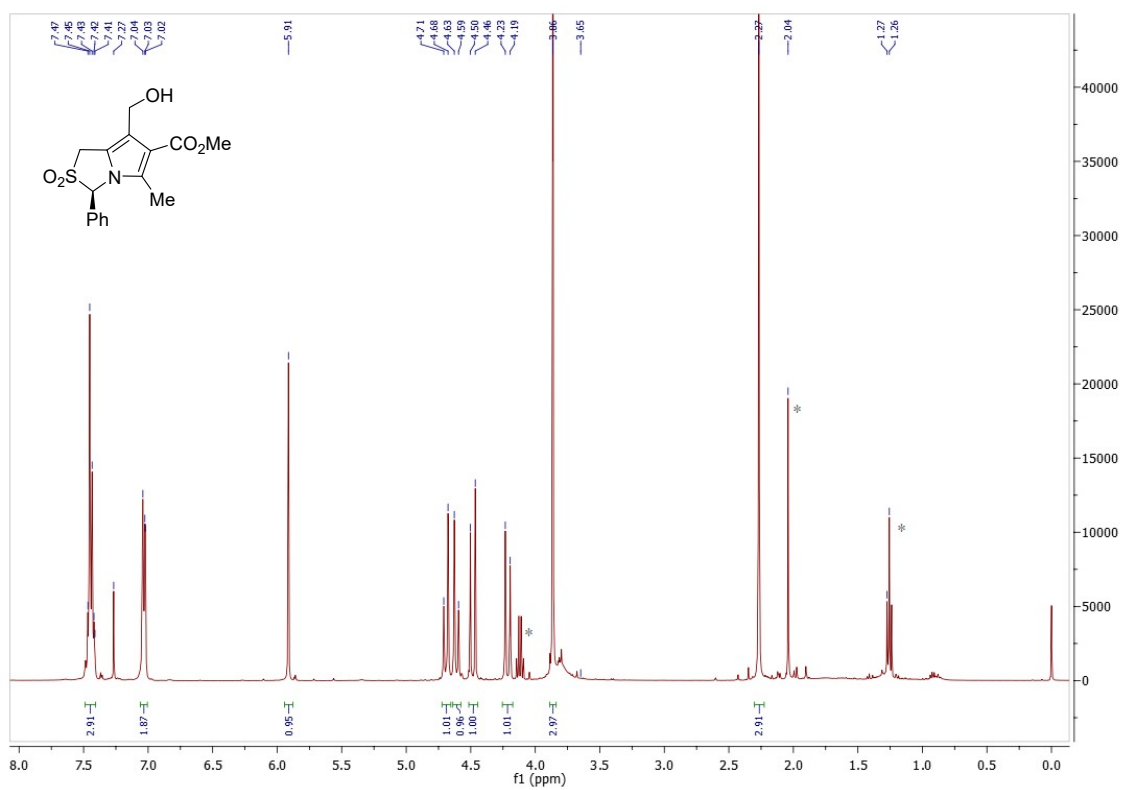

**Figure S38:** <sup>1</sup>H NMR spectrum of compound **14** (400 MHz, CDCl<sub>3</sub>). \*ethyl acetate

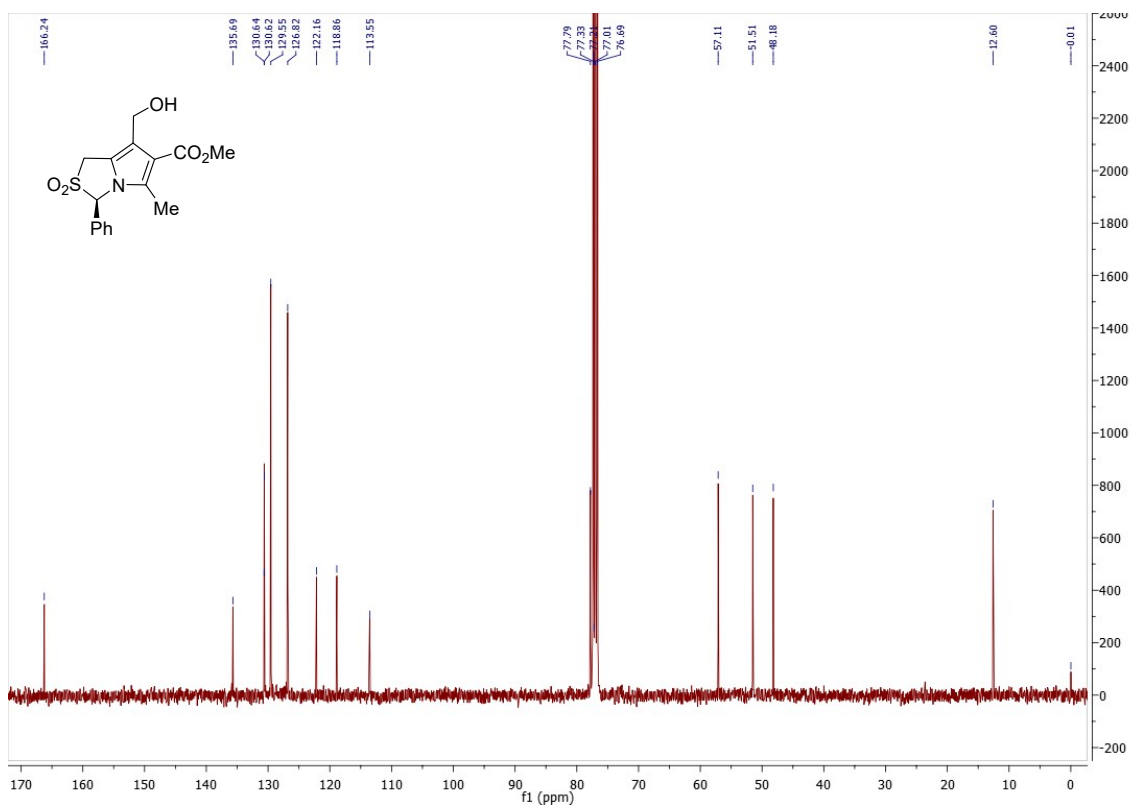

**Figure S39:** <sup>13</sup>C NMR spectrum of compound 14 (100 MHz, CDCl<sub>3</sub>).

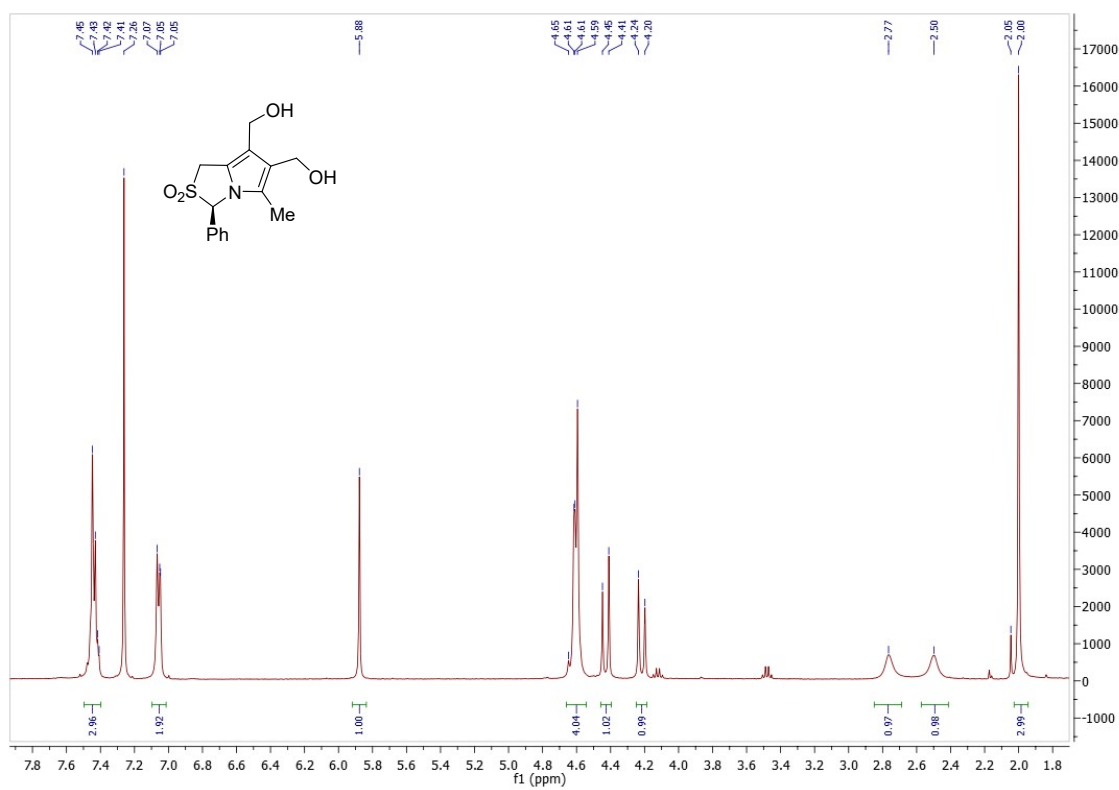

**Figure S40:** <sup>1</sup>H NMR spectrum of compound 15 (400 MHz, CDCl<sub>3</sub>).

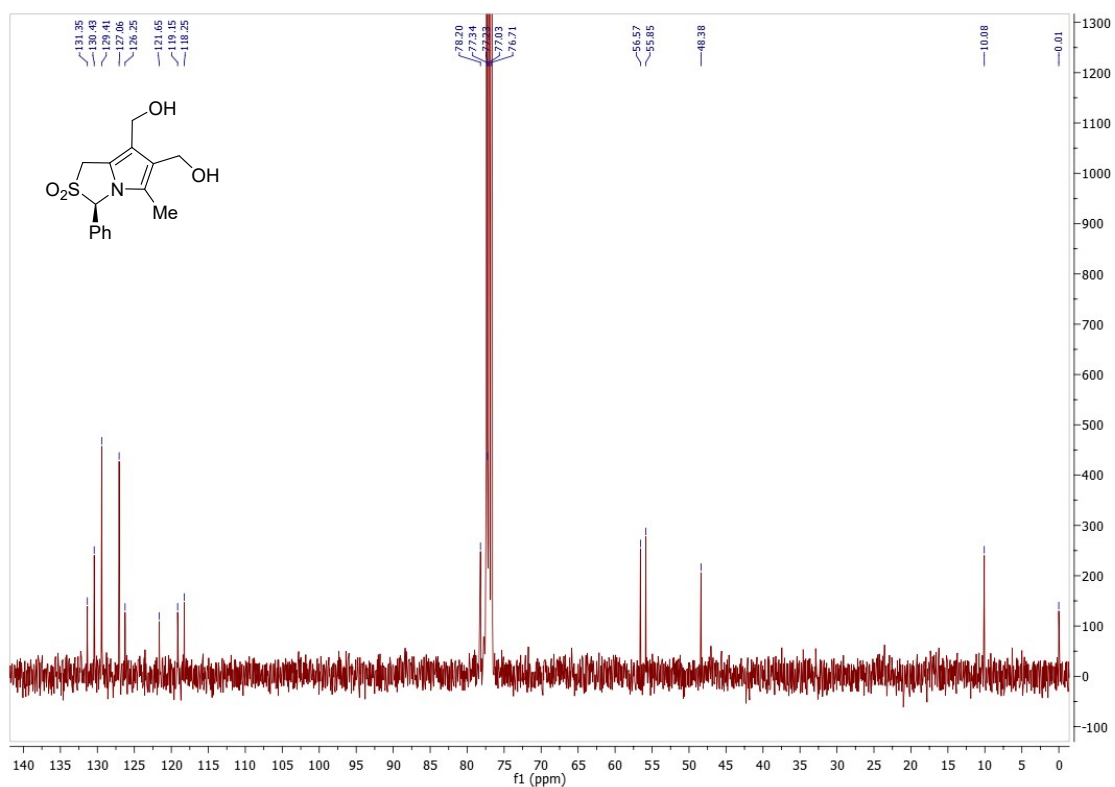

**Figure S41:** <sup>13</sup>C NMR spectrum of compound **15** (100 MHz, CDCl<sub>3</sub>).

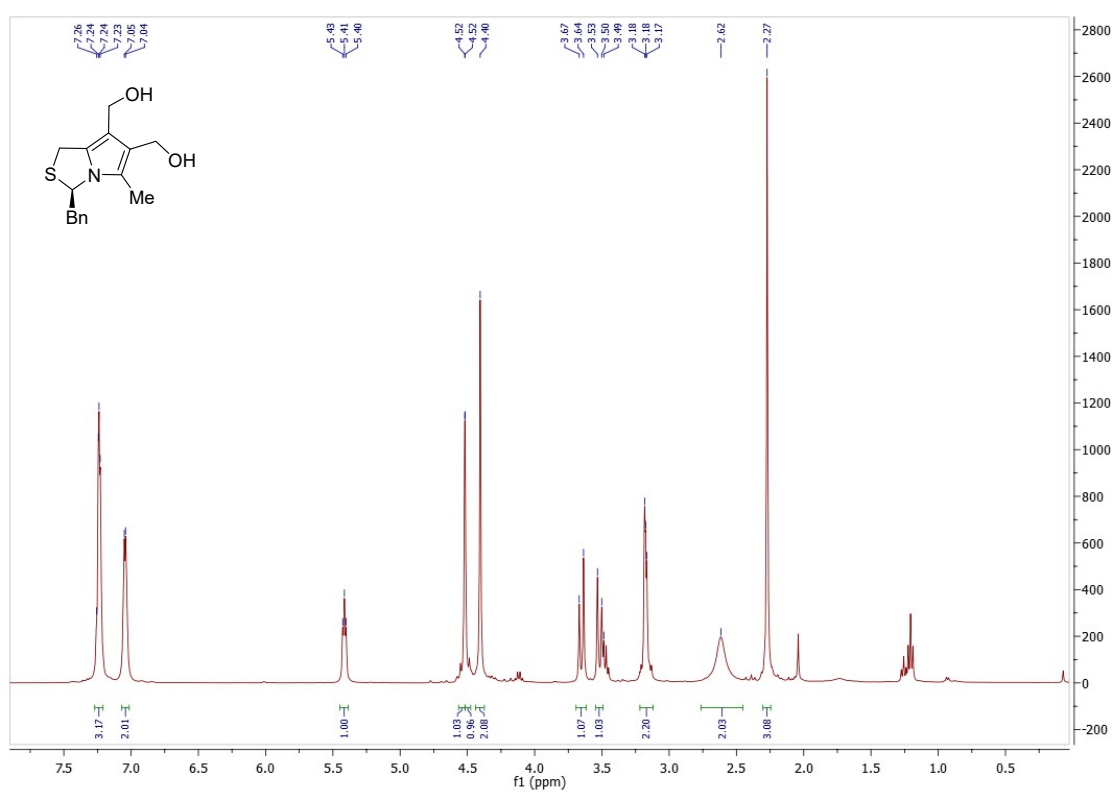

**Figure S42:** <sup>1</sup>H NMR spectrum of compound **17a** (400 MHz, CDCl<sub>3</sub>).

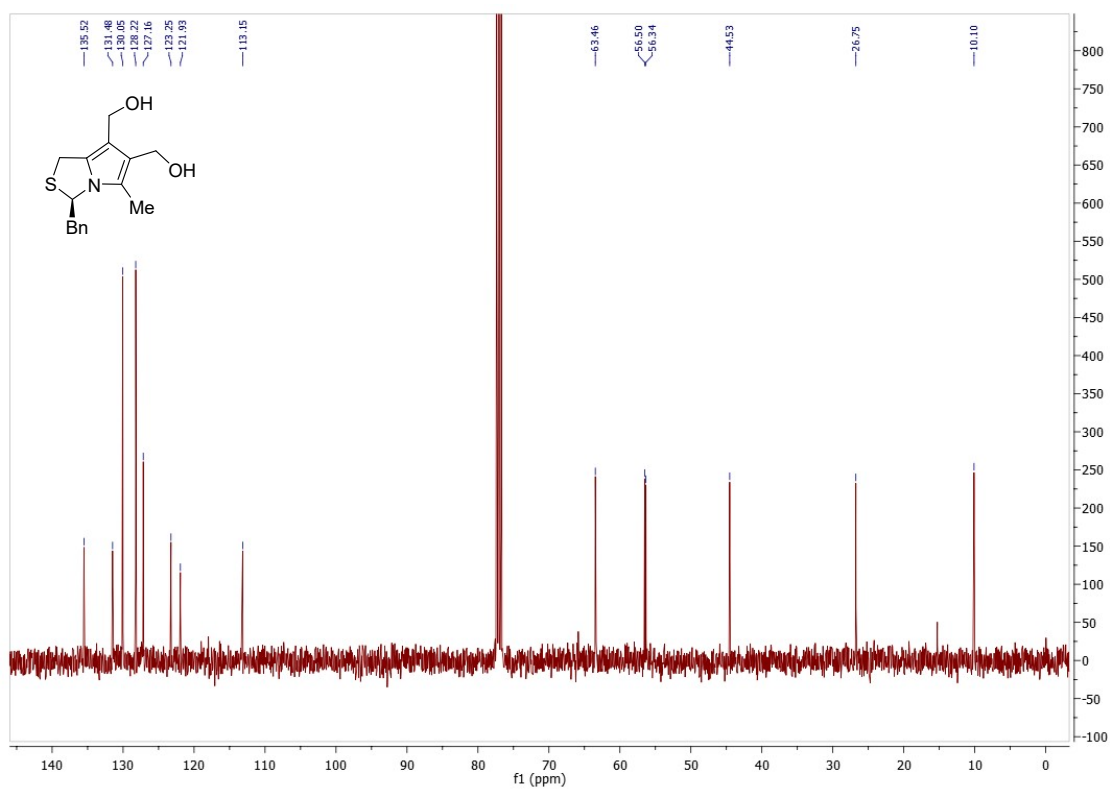

**Figure S43:** <sup>13</sup>C NMR spectrum of compound 17a (100 MHz, CDCl<sub>3</sub>).

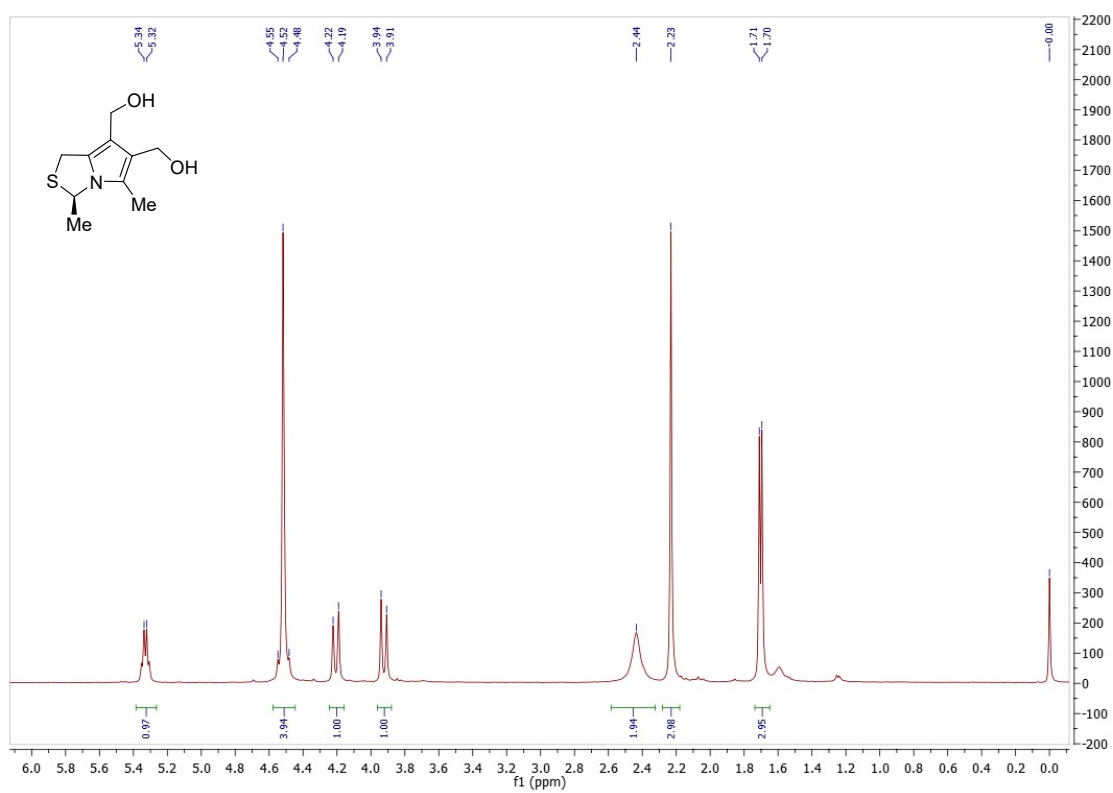

**Figure S44:** <sup>1</sup>H NMR spectrum of compound 17b (400 MHz, CDCl<sub>3</sub>).



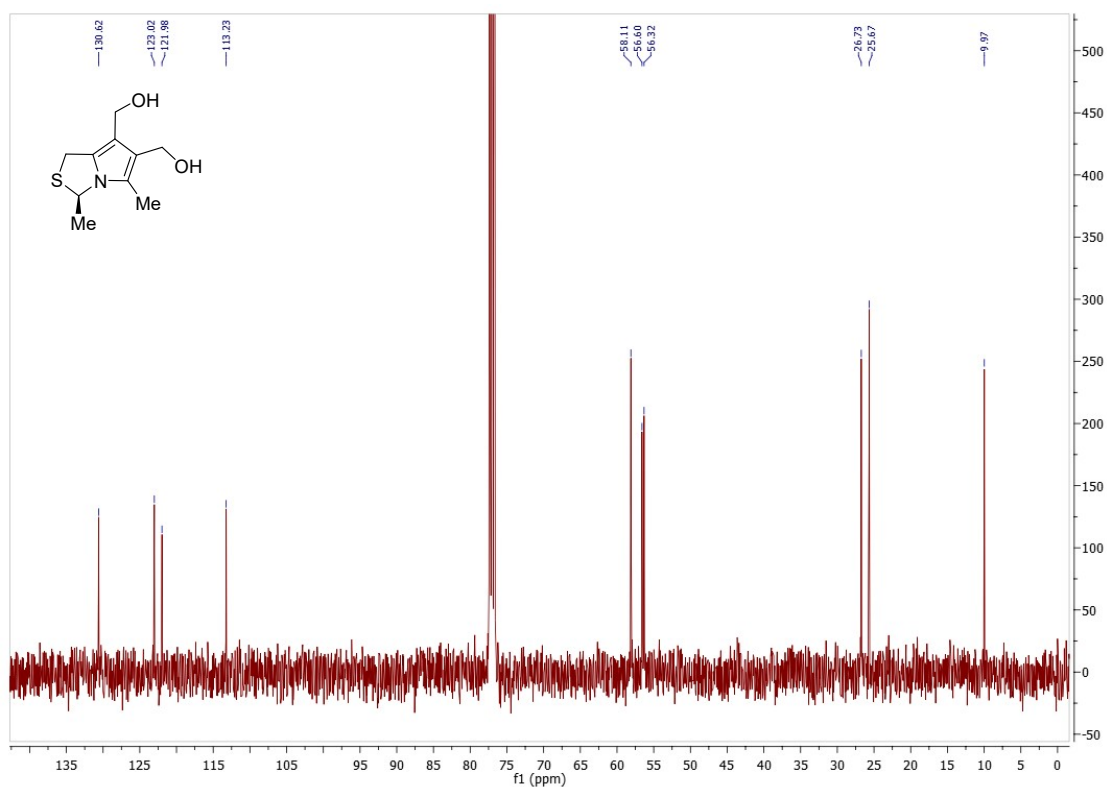

Figure S45:  $^{13}\text{C}$  NMR spectrum of compound **17b** (100 MHz,  $\text{CDCl}_3$ ).

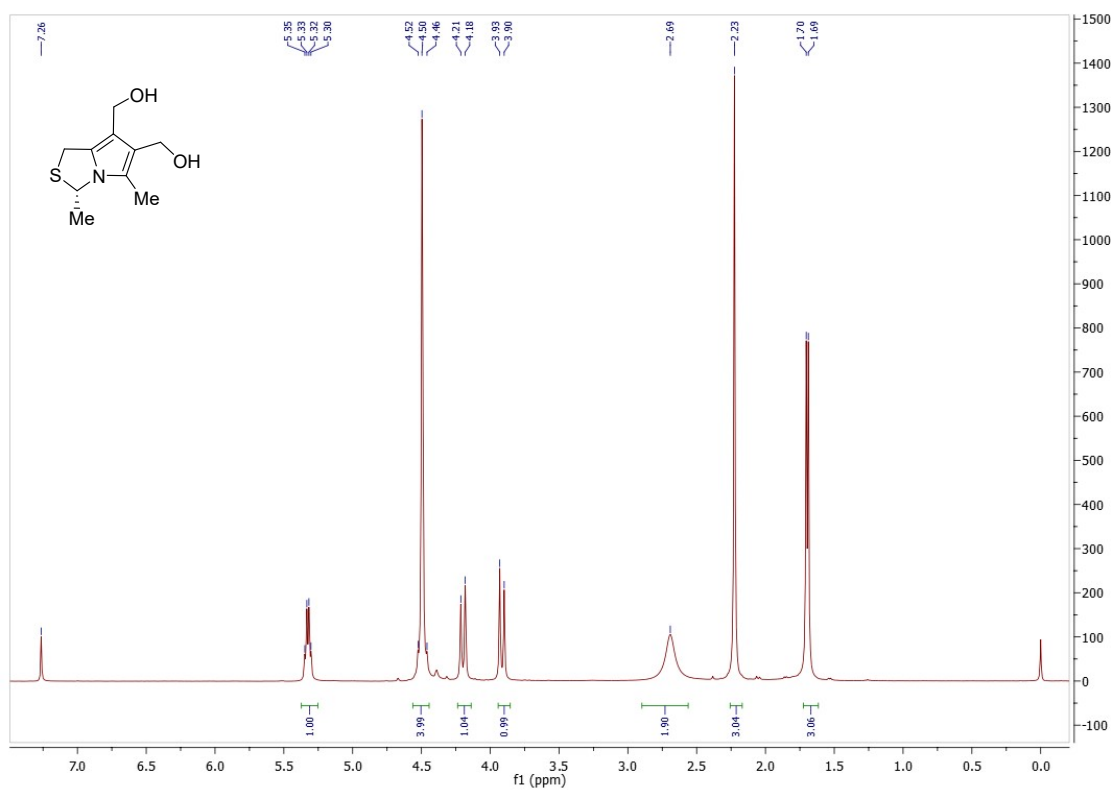

Figure S46:  $^1\text{H}$  NMR spectrum of compound **17c** (400 MHz,  $\text{CDCl}_3$ ).

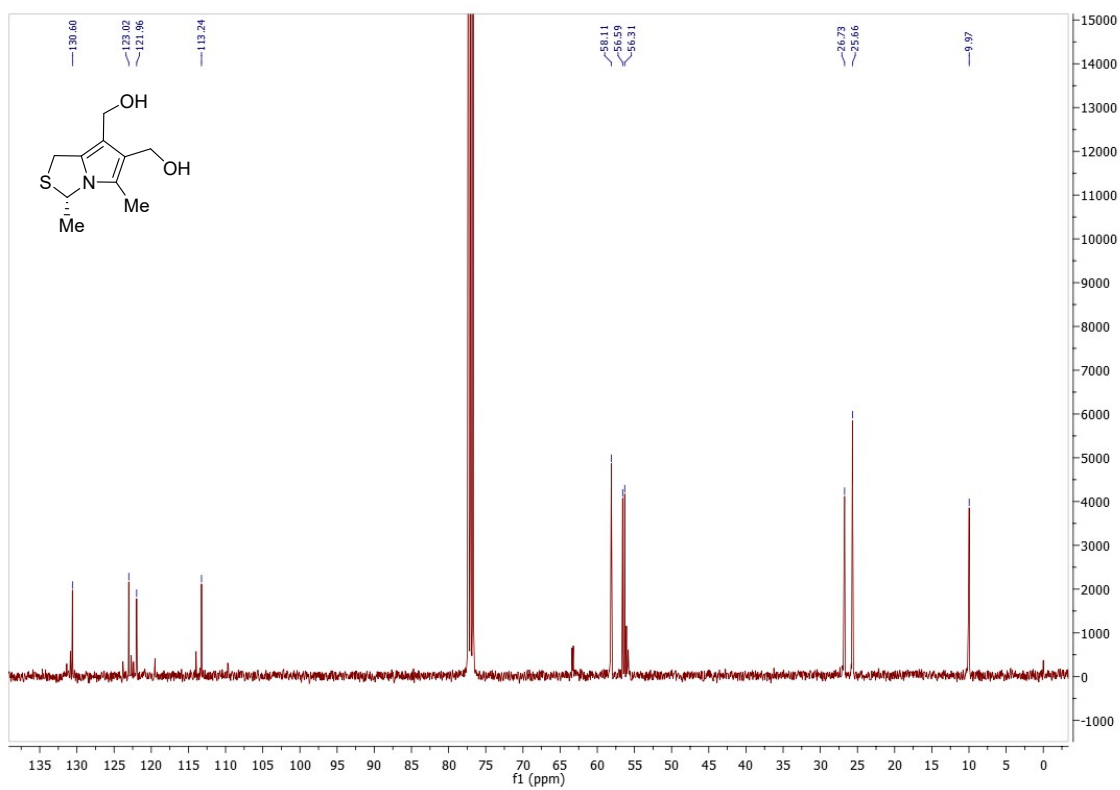

**Figure S47:** <sup>13</sup>C NMR spectrum of compound 17c (100 MHz, CDCl<sub>3</sub>).
